# Supplementary material for: Theoretical studies on the structure and thermochemistry of cyclicparaphenylenediazenes
Source: Royal Society of Chemistry journal article supplement (doi:10.1039/c7ra06409h), 2017-01-01
Supplement: c7ra06409h1.pdf [file c7ra06409h1.pdf]

## Supporting Information

### Theoretical Studies on the Structure and Thermochemistry of Cyclicparaphenylenediazenes

---

Mohamad Akbar Ali\*<sup>1</sup>, Mohammad A. Alam\*<sup>2</sup>

<sup>1</sup>Department of Chemistry, *Sejong University*, Seoul, 143-747, Republic of Korea

<sup>2</sup>Department of Chemistry and Physics, College of Science and Mathematics, *Arkansas State University*, Jonesboro, AR 72467, USA

\*Corresponding authors

Email: [akbar256@sejong.ac.kr](mailto:akbar256@sejong.ac.kr); [malam@astate.edu](mailto:malam@astate.edu)

**Table S1:** Optimized geometries of cis-cyclic [n<sub>c</sub>]paraphenylenediazenes ([n<sub>c</sub>]CPPDs) obtained using at the B3LYP/6-31+G(d,p). *Page 2-12*

**Table S2:** Optimized geometries of trans-cyclic [n<sub>t</sub>]paraphenylenediazenes ([n<sub>t</sub>]CPPDs) obtained at using the B3LYP/6-31+G(d,p). *Page 13-19*

**Table S3:** Vibrational frequencies cis-cyclic [n<sub>c</sub>]paraphenylenediazenes ([n<sub>c</sub>]CPPDs) obtained using at the B3LYP/6-31+G(d,p). *Page 20-31*

**Table S4:** Vibrational frequencies trans-cyclic [n<sub>t</sub>]paraphenylenediazenes ([n<sub>t</sub>]CPPDs) obtained using at the B3LYP/6-31+G(d,p). *Page 32-38*.

**Table S5:** Optimized geometries of all cis-[n<sub>c</sub>]CPPDs (n = 2 to 8) and all trans-[n<sub>t</sub>]CPPDs (n = 2 to 8) comparing to strain free molecules. *Page 39*.

**Table S6:** Zero point energy (kJ mol<sup>-1</sup>), entropy (cal mol<sup>-1</sup> K<sup>-1</sup>) and thermal correction (kJ mol<sup>-1</sup>). *Page 40*.

**Table S7:** Ring diameter (rd) (nm) and HOMO-LUMO (H-L) gap (eV) for cis and trans isomer of CPPDs, CPPAs, and CPPs. *Page 41*.

**Figure S1:** Different initial guess of [6<sub>t</sub>]CPPD . *Page 42-43*.

**Figure S2:** HOMO and LUMO spatial diagram for [n]CPPD (n = 2 to 4) obtained using B3LYP/6-31+G(d,p) level of theory. *Page 44-45*.

**Full Reference of Gaussian 09.** *Page 46*.

**Table S1:** Optimized geometries of cis-cyclic [ $n_c$ ]paraphenylenediazenes obtained using the B3LYP/6-31+G(d,p).

| <b>[2<sub>c</sub>]CPPD</b> |             |             |             | <b>[3<sub>c</sub>]CPPD</b> |             |             |             |
|----------------------------|-------------|-------------|-------------|----------------------------|-------------|-------------|-------------|
| C                          | 0.69896900  | 1.52210100  | 1.20412600  | C                          | -2.78468100 | 0.01946600  | 0.05090700  |
| C                          | -0.69896900 | 1.52210100  | 1.20412600  | C                          | -2.73588700 | -0.85784800 | 1.13884700  |
| C                          | -1.37768300 | 1.30109500  | 0.00000000  | C                          | -2.01883600 | -2.05080500 | 1.03563400  |
| C                          | -0.69896900 | 1.52210100  | -1.20412600 | C                          | -1.37423100 | -2.37944000 | -0.16333700 |
| C                          | 0.69896900  | 1.52210100  | -1.20412600 | C                          | -1.56812800 | -1.57967900 | -1.29461500 |
| C                          | 1.37768300  | 1.30109500  | 0.00000000  | C                          | -2.25762000 | -0.37450500 | -1.18400100 |
| H                          | 1.23777600  | 1.49815100  | 2.14621700  | H                          | -3.21734200 | -0.58636800 | 2.07339300  |
| H                          | -1.23777600 | 1.49815100  | 2.14621700  | H                          | -1.93705000 | -2.71715600 | 1.88866100  |
| H                          | -1.23777600 | 1.49815100  | -2.14621700 | H                          | -1.16551000 | -1.88452900 | -2.25355400 |
| H                          | 1.23777600  | 1.49815100  | -2.14621700 | H                          | -2.36894500 | 0.26936100  | -2.05022900 |
| H                          | -1.23777600 | -1.49815100 | 2.14621700  | H                          | -1.24924500 | 3.44110100  | -1.74930400 |
| C                          | -0.69896900 | -1.52210100 | 1.20412600  | C                          | -0.69823900 | 2.98309500  | -0.93372400 |
| C                          | 0.69896900  | -1.52210100 | 1.20412600  | C                          | 0.69824200  | 2.98309400  | -0.93372400 |
| C                          | -1.37768300 | -1.30109500 | 0.00000000  | C                          | -1.39643600 | 2.35732900  | 0.10593800  |
| H                          | 1.23777600  | -1.49815100 | 2.14621700  | C                          | 1.39643900  | 2.35732700  | 0.10593700  |
| C                          | -0.69896900 | -1.52210100 | -1.20412600 | H                          | 1.24924800  | 3.44110000  | -1.74930500 |
| C                          | 0.69896900  | -1.52210100 | -1.20412600 | C                          | -0.69471200 | 1.85677500  | 1.21127600  |
| H                          | -1.23777600 | -1.49815100 | -2.14621700 | C                          | 0.69471500  | 1.85677500  | 1.21127500  |
| H                          | 1.23777600  | -1.49815100 | -2.14621700 | H                          | -1.23442600 | 1.45733400  | 2.06196700  |
| C                          | 1.37768300  | -1.30109500 | 0.00000000  | H                          | 1.23442900  | 1.45733300  | 2.06196600  |
| N                          | 2.67926300  | -0.63108500 | 0.00000000  | H                          | 2.36894100  | 0.26936000  | -2.05022900 |
| N                          | 2.67926300  | 0.63108500  | 0.00000000  | C                          | 2.25761700  | -0.37450600 | -1.18400100 |
| N                          | -2.67926300 | -0.63108500 | 0.00000000  | C                          | 2.78468100  | 0.01946300  | 0.05090600  |
| N                          | -2.67926300 | 0.63108500  | 0.00000000  | C                          | 1.56812400  | -1.57967900 | -1.29461500 |
|                            |             |             |             | C                          | 2.73588800  | -0.85785200 | 1.13884500  |
|                            |             |             |             | C                          | 1.37422900  | -2.37944100 | -0.16333700 |
|                            |             |             |             | H                          | 1.16550300  | -1.88452800 | -2.25355300 |
|                            |             |             |             | C                          | 2.01883600  | -2.05080800 | 1.03563300  |
|                            |             |             |             | H                          | 3.21734600  | -0.58637300 | 2.07339000  |
|                            |             |             |             | H                          | 1.93705100  | -2.71716000 | 1.88865900  |
|                            |             |             |             | N                          | 3.47776900  | 1.28348500  | 0.15726400  |
|                            |             |             |             | N                          | 2.83841100  | 2.35757800  | 0.09929700  |
|                            |             |             |             | N                          | -2.83840800 | 2.35758100  | 0.09929800  |
|                            |             |             |             | N                          | -3.47776700 | 1.28348900  | 0.15726500  |
|                            |             |             |             | N                          | -0.62497200 | -3.61621100 | -0.22405700 |

|  |   |            |             |             |
|--|---|------------|-------------|-------------|
|  | N | 0.62496800 | -3.61621200 | -0.22405600 |
|--|---|------------|-------------|-------------|

| <b>[4<sub>c</sub>]CPPD</b> |             |             |             | <b>[5<sub>c</sub>]CPPD</b> |             |             |             |
|----------------------------|-------------|-------------|-------------|----------------------------|-------------|-------------|-------------|
| C                          | 0.69589600  | 2.75334400  | 0.82092700  | C                          | -3.65998000 | -2.65033900 | 0.04569800  |
| C                          | 1.40192900  | 3.43903300  | -0.18298700 | C                          | -4.21868000 | -1.70391200 | -0.80369600 |
| C                          | 0.69431400  | 4.16029600  | -1.15888900 | C                          | -4.34753800 | -0.36589900 | -0.39482700 |
| C                          | -0.69432300 | 4.16029800  | -1.15888600 | C                          | -4.02259700 | -0.00952700 | 0.92588400  |
| C                          | -1.40193700 | 3.43903600  | -0.18298200 | C                          | -3.53817000 | -0.97535000 | 1.80234900  |
| C                          | -0.69590200 | 2.75334400  | 0.82092800  | C                          | -3.29146900 | -2.28011500 | 1.34995300  |
| H                          | 1.23433000  | 2.24979300  | 1.61651700  | H                          | -3.53239400 | -3.67540500 | -0.28535500 |
| H                          | 1.25100700  | 4.74359400  | -1.88558500 | H                          | -4.55632700 | -1.97954200 | -1.79770500 |
| H                          | -1.25101700 | 4.74359800  | -1.88558000 | H                          | -4.18745700 | 1.00196400  | 1.27762400  |
| H                          | -1.23433300 | 2.24979400  | 1.61652000  | H                          | -3.32675900 | -0.72728000 | 2.83782700  |
| C                          | 3.43903400  | 1.40193100  | 0.18297700  | H                          | 0.82504200  | -6.05052100 | -0.94424900 |
| C                          | 2.75335800  | 0.69589600  | -0.82094400 | C                          | 0.46472200  | -5.11980500 | -0.51757600 |
| C                          | 4.16028600  | 0.69431700  | 1.15888800  | C                          | 0.97691100  | -3.90814900 | -1.00527000 |
| C                          | 2.75335900  | -0.69590200 | -0.82094400 | C                          | -0.46547000 | -5.11974200 | 0.51757100  |
| H                          | 2.24981800  | 1.23432800  | -1.61654200 | C                          | 0.48412900  | -2.69227200 | -0.49632400 |
| C                          | 4.16028700  | -0.69432000 | 1.15888900  | C                          | -0.97748300 | -3.90801500 | 1.00527400  |
| H                          | 4.74357300  | 1.25101200  | 1.88559200  | H                          | -0.82592800 | -6.05040800 | 0.94423500  |
| C                          | 3.43903600  | -1.40193500 | 0.18297800  | C                          | -0.48452200 | -2.69220600 | 0.49634000  |
| H                          | 2.24981900  | -1.23433500 | -1.61654000 | H                          | 0.84860000  | -1.74893300 | -0.88330600 |
| H                          | 4.74357600  | -1.25101300 | 1.88559200  | H                          | -0.84885500 | -1.74881600 | 0.88333000  |
| C                          | -4.16030500 | 0.69432100  | 1.15888500  | C                          | -3.64357500 | 2.39463800  | -0.91188500 |
| C                          | -4.16030400 | -0.69431600 | 1.15888600  | C                          | -2.33253000 | 2.09189700  | -1.32017700 |
| C                          | -3.43903400 | 1.40193600  | 0.18298900  | C                          | -3.88955000 | 3.57104300  | -0.18652600 |
| C                          | -3.43903200 | -1.40193000 | 0.18299000  | C                          | -1.27709700 | 2.94291700  | -0.99228700 |
| H                          | -4.74361000 | -1.25101000 | 1.88557500  | H                          | -2.15051500 | 1.21381200  | -1.93220000 |
| C                          | -2.75333300 | 0.69590200  | -0.82091600 | C                          | -2.83645400 | 4.40952600  | 0.14516900  |
| C                          | -2.75333200 | -0.69589600 | -0.82091600 | H                          | -4.91068200 | 3.83340400  | 0.07244100  |
| H                          | -2.24977600 | 1.23433400  | -1.61650200 | C                          | -1.51447100 | 4.11044000  | -0.24246600 |
| H                          | -2.24977500 | -1.23432800 | -1.61650200 | H                          | -0.28048300 | 2.71636300  | -1.35435100 |
| C                          | -1.40193200 | -3.43903400 | -0.18297900 | H                          | -3.01443800 | 5.34561500  | 0.66478700  |
| C                          | -0.69431900 | -4.16029200 | -1.15888700 | H                          | 0.28088500  | 2.71631800  | 1.35431800  |
| C                          | -0.69589600 | -2.75335000 | 0.82093600  | C                          | 1.27753300  | 2.94272700  | 0.99226200  |
| C                          | 0.69431800  | -4.16029300 | -1.15888900 | C                          | 2.33284000  | 2.09155500  | 1.32016000  |
| H                          | -1.25101400 | -4.74358500 | -1.88558500 | C                          | 1.51508500  | 4.11021700  | 0.24244500  |
| C                          | 0.69590200  | -2.75335200 | 0.82093400  | C                          | 3.64393300  | 2.39410600  | 0.91188200  |
| H                          | -1.23432700 | -2.24980500 | 1.61653100  | H                          | 2.15069300  | 1.21349400  | 1.93218200  |
| C                          | 1.40193400  | -3.43903500 | -0.18298400 | C                          | 2.83711400  | 4.40911000  | -0.14517900 |

|                                        |             |             |             |                                        |             |             |             |
|----------------------------------------|-------------|-------------|-------------|----------------------------------------|-------------|-------------|-------------|
| H                                      | 1.25101000  | -4.74358700 | -1.88558900 | C                                      | 3.89008500  | 3.57047400  | 0.18652600  |
| H                                      | 1.23433600  | -2.24980600 | 1.61652700  | H                                      | 3.01523900  | 5.34517500  | -0.66479400 |
| H                                      | -4.74361200 | 1.25101500  | 1.88557300  | H                                      | 4.91125800  | 3.83268900  | -0.07243200 |
| N                                      | -2.81142000 | 3.67457800  | -0.13165700 | H                                      | 4.18757200  | 1.00137600  | -1.27759400 |
| N                                      | -3.67457800 | 2.81141900  | 0.13166100  | C                                      | 4.02257400  | -0.01009700 | -0.92586300 |
| N                                      | -3.67457400 | -2.81141400 | 0.13166300  | C                                      | 4.34748000  | -0.36652700 | 0.39484100  |
| N                                      | -2.81141600 | -3.67457300 | -0.13165800 | C                                      | 3.53800200  | -0.97584300 | -1.80233300 |
| N                                      | 2.81141800  | -3.67457600 | -0.13166700 | C                                      | 4.21843400  | -1.70452500 | 0.80370000  |
| N                                      | 3.67457500  | -2.81141900 | 0.13166300  | C                                      | 3.29112300  | -2.28057800 | -1.34994800 |
| N                                      | 3.67457100  | 2.81141600  | 0.13166000  | H                                      | 3.32661800  | -0.72773400 | -2.83780600 |
| N                                      | 2.81141400  | 3.67457300  | -0.13166800 | C                                      | 3.65959300  | -2.65086500 | -0.04569800 |
| <b>[6<sub>c</sub>]CPPD<sub>1</sub></b> |             |             |             | H                                      | 4.55605100  | -1.98021300 | 1.79770300  |
| C                                      | -2.11281900 | 2.08765500  | 2.27444800  | H                                      | 3.53186600  | -3.67591700 | 0.28534600  |
| C                                      | -2.93921600 | 0.95334500  | 2.32429800  | N                                      | 1.87018800  | -4.00678900 | -2.11951400 |
| C                                      | -4.15026500 | 0.94185100  | 1.64197400  | N                                      | 2.83289600  | -3.23218800 | -2.31479300 |
| C                                      | -4.58320800 | 2.09328300  | 0.96370600  | N                                      | 5.02755100  | 0.49406300  | 1.31086400  |
| C                                      | -3.82219600 | 3.26998500  | 1.03811500  | N                                      | 4.77653400  | 1.70720100  | 1.45583900  |
| C                                      | -2.57495900 | 3.26146100  | 1.65730500  | N                                      | 0.62426500  | 5.20771800  | 0.04636400  |
| H                                      | -2.60615800 | 0.08325000  | 2.88154500  | N                                      | -0.62349000 | 5.20781000  | -0.04638600 |
| H                                      | -4.76874200 | 0.05092600  | 1.65012200  | N                                      | -4.77628200 | 1.70789800  | -1.45583000 |
| H                                      | -4.20822300 | 4.17702400  | 0.58330800  | N                                      | -5.02747700 | 0.49479600  | -1.31085200 |
| H                                      | -1.96923800 | 4.16164900  | 1.67995200  | N                                      | -2.83338000 | -3.23179700 | 2.31479300  |
| H                                      | 0.09483100  | 1.92438100  | -2.04621800 | N                                      | -1.87078000 | -4.00653300 | 2.11951300  |
| C                                      | 0.57288400  | 2.29447400  | -1.14408200 | <b>[7<sub>c</sub>]CPPD<sub>1</sub></b> |             |             |             |
| C                                      | 1.78920000  | 2.98377900  | -1.24317100 | C                                      | 5.48876700  | -1.61052300 | 1.32390500  |
| C                                      | -0.00498800 | 2.06164700  | 0.10136600  | C                                      | 4.38723200  | -1.74374100 | 2.15906200  |
| C                                      | 2.40004600  | 3.49223600  | -0.08869900 | C                                      | 3.45067500  | -2.76825800 | 1.94620100  |
| C                                      | 0.60165100  | 2.56820900  | 1.26791200  | C                                      | 3.69122300  | -3.72997300 | 0.95001500  |
| H                                      | -0.91657000 | 1.48169900  | 0.15923300  | C                                      | 4.83256400  | -3.63872300 | 0.16442400  |
| C                                      | 1.81292500  | 3.27012600  | 1.15175900  | C                                      | 5.71069900  | -2.55166900 | 0.30373400  |
| H                                      | 3.32882400  | 4.04727900  | -0.16605300 | H                                      | 6.19783600  | -0.80558500 | 1.48476400  |
| H                                      | 2.28842100  | 3.62352900  | 2.06146500  | H                                      | 4.22713500  | -1.05496800 | 2.98287800  |
| C                                      | -5.48583400 | 0.28399700  | -1.02903000 | H                                      | 3.00627900  | -4.56124700 | 0.82115900  |
| C                                      | -6.10488500 | -0.96161500 | -1.21476400 | H                                      | 5.05918600  | -4.39957900 | -0.57618200 |
| C                                      | -4.20031000 | 0.49995600  | -1.55007500 | H                                      | 8.75921100  | 0.59085600  | -0.68700400 |
| C                                      | -5.41484400 | -2.00916700 | -1.82113900 | C                                      | 7.72594600  | 0.77883500  | -0.96197400 |
| H                                      | -7.12848200 | -1.09370500 | -0.87844600 | C                                      | 6.85672500  | -0.31428900 | -1.10956100 |
| C                                      | -3.50670500 | -0.54609300 | -2.14683300 | C                                      | 7.27106900  | 2.07143400  | -1.18624200 |

|   |             |             |             |   |             |             |             |
|---|-------------|-------------|-------------|---|-------------|-------------|-------------|
| H | -3.74583100 | 1.48223600  | -1.48984700 | C | 5.54278700  | -0.09703000 | -1.55706100 |
| C | -4.09286500 | -1.81744800 | -2.24077200 | C | 5.93500300  | 2.29288300  | -1.55256900 |
| H | -5.88994000 | -2.97422600 | -1.96691300 | H | 7.93789200  | 2.92276200  | -1.08962500 |
| H | -2.51661100 | -0.37775600 | -2.55611900 | C | 5.08457600  | 1.19646600  | -1.77231800 |
| C | -1.78920000 | -2.98378700 | -1.24315600 | H | 4.88839200  | -0.94090000 | -1.74737400 |
| C | -0.57288300 | -2.29448100 | -1.14407100 | H | 4.07370700  | 1.35764700  | -2.13060900 |
| C | -2.40004500 | -3.49223700 | -0.08868200 | H | 1.62762600  | -1.37664000 | 0.59105600  |
| C | 0.00498800  | -2.06164600 | 0.10137500  | C | 0.90252700  | -2.15736500 | 0.38940000  |
| H | -0.09483100 | -1.92439300 | -2.04621000 | C | 0.21257400  | -2.17092000 | -0.81638200 |
| C | -1.81292500 | -3.27011900 | 1.15177600  | C | 0.65841400  | -3.15724100 | 1.34690900  |
| H | -3.32882300 | -4.04728100 | -0.16603200 | C | -0.76554200 | -3.14695500 | -1.06635900 |
| C | -0.60165100 | -2.56820000 | 1.26792500  | H | 0.41394000  | -1.42266700 | -1.57768400 |
| H | 0.91657000  | -1.48169700 | 0.15923900  | C | -0.32708100 | -4.12511700 | 1.09791900  |
| H | -2.28842100 | -3.62351600 | 2.06148300  | C | -1.02169200 | -4.13763000 | -0.10544000 |
| C | 2.11281800  | -2.08764000 | 2.27445900  | H | -0.53261400 | -4.86582200 | 1.86500700  |
| C | 2.93921500  | -0.95333000 | 2.32430100  | H | -1.76476300 | -4.90351000 | -0.30371400 |
| C | 2.57495900  | -3.26145000 | 1.65732500  | H | 5.02789800  | 3.34525000  | 0.98228200  |
| C | 4.15026400  | -0.94184100 | 1.64197800  | C | 3.98790500  | 3.23279100  | 0.69450400  |
| H | 2.60615700  | -0.08323000 | 2.88154100  | C | 3.58278600  | 3.55208800  | -0.61031800 |
| C | 3.82219600  | -3.26997900 | 1.03813600  | C | 3.05124300  | 2.75749000  | 1.59973600  |
| H | 1.96923800  | -4.16163800 | 1.67997900  | C | 2.22968500  | 3.44983000  | -0.96649300 |
| C | 4.58320800  | -2.09327700 | 0.96371900  | C | 1.69899000  | 2.60887500  | 1.24341300  |
| H | 4.76874100  | -0.05091500 | 1.65012000  | H | 3.34173000  | 2.46933400  | 2.60523800  |
| H | 4.20822300  | -4.17702200 | 0.58333700  | C | 1.29539400  | 2.96091500  | -0.06111500 |
| H | 7.12848400  | 1.09369700  | -0.87845300 | H | 1.92549300  | 3.73942500  | -1.96802600 |
| C | 6.10488600  | 0.96160600  | -1.21477000 | H | 0.26780500  | 2.85007400  | -0.37779500 |
| C | 5.48583500  | -0.28400500 | -1.02902700 | C | -1.24400200 | 2.55017000  | 1.48849000  |
| C | 5.41484600  | 2.00915400  | -1.82115000 | C | -2.01397900 | 1.74642500  | 0.63307800  |
| C | 4.20031000  | -0.49996600 | -1.55006900 | C | -1.55251900 | 3.91089200  | 1.63006600  |
| C | 4.09286600  | 1.81743400  | -2.24078000 | C | -3.07590800 | 2.29087200  | -0.07669800 |
| H | 5.88994100  | 2.97421300  | -1.96693100 | H | -1.76160400 | 0.69475900  | 0.52996100  |
| C | 3.50670500  | 0.54608000  | -2.14683300 | C | -2.61189600 | 4.45375400  | 0.91015000  |
| H | 3.74583000  | -1.48224500 | -1.48983500 | H | -0.96170500 | 4.53129900  | 2.29689500  |
| H | 2.51661000  | 0.37774000  | -2.55611600 | C | -3.40923000 | 3.64830500  | 0.08317500  |
| N | 0.23004100  | 2.31984400  | 2.63220200  | H | -3.64129300 | 1.66173700  | -0.75332000 |
| N | -0.91492700 | 2.04476800  | 3.05158700  | H | -2.84773500 | 5.51120000  | 0.98431700  |
| N | -5.86731800 | 2.18240700  | 0.33413800  | C | -3.59921400 | -3.00788900 | -1.70100600 |
| N | -6.29552400 | 1.33236600  | -0.47885500 | C | -4.82301600 | -3.61733400 | -2.02333600 |

|                                                            |             |             |             |                                        |             |             |             |
|------------------------------------------------------------|-------------|-------------|-------------|----------------------------------------|-------------|-------------|-------------|
| N                                                          | -3.41238800 | -2.87198300 | -2.94209100 | C                                      | -3.55069500 | -2.09167500 | -0.63348800 |
| N                                                          | -2.32289800 | -3.32424300 | -2.53504700 | C                                      | -5.96261900 | -3.35783500 | -1.27250200 |
| N                                                          | -0.23004200 | -2.31982600 | 2.63221300  | H                                      | -4.85381400 | -4.29829400 | -2.86830700 |
| N                                                          | 0.91492500  | -2.04474700 | 3.05159700  | C                                      | -4.70260500 | -1.78203700 | 0.07529900  |
| N                                                          | 5.86731800  | -2.18240600 | 0.33415300  | H                                      | -2.62048900 | -1.60104300 | -0.37510700 |
| N                                                          | 6.29552400  | -1.33237000 | -0.47884600 | C                                      | -5.92381500 | -2.39711000 | -0.25221800 |
| N                                                          | 3.41238800  | 2.87196400  | -2.94210500 | H                                      | -6.90134600 | -3.85808100 | -1.48993100 |
| N                                                          | 2.32289900  | 3.32422700  | -2.53506400 | H                                      | -4.65840100 | -1.06353400 | 0.88612100  |
| <b>[8<sub>c</sub>]CPPD<sub>1</sub> (at B3LYP/6-31G(d))</b> |             |             |             |                                        |             |             |             |
| C                                                          | 6.46662400  | -1.43182500 | 1.89264300  | C                                      | -7.00750800 | 0.13354800  | 0.37156000  |
| C                                                          | 6.02117200  | -0.16046100 | 1.49060300  | C                                      | -6.89583700 | 0.40596900  | -1.00061700 |
| C                                                          | 7.30146300  | -2.17068600 | 1.03849100  | C                                      | -6.72153200 | 1.13895300  | 1.30583300  |
| C                                                          | 6.32554200  | 0.31515700  | 0.22148100  | C                                      | -6.43160500 | 1.64588400  | -1.42392000 |
| H                                                          | 5.44482000  | 0.45777700  | 2.16922400  | H                                      | -7.18448300 | -0.34583600 | -1.72779700 |
| C                                                          | 7.61655100  | -1.69251500 | -0.22637800 | C                                      | -6.17695200 | 2.34681400  | 0.88540100  |
| H                                                          | 7.69748200  | -3.11736800 | 1.39268700  | H                                      | -6.88771100 | 0.94173300  | 2.36056800  |
| C                                                          | 7.09115900  | -0.46608300 | -0.65964800 | C                                      | -5.99458500 | 2.59063900  | -0.48475200 |
| H                                                          | 5.98562000  | 1.29853300  | -0.08761600 | H                                      | -6.36170700 | 1.88042700  | -2.48176700 |
| H                                                          | 8.26950200  | -2.25246700 | -0.88878000 | H                                      | -5.89963400 | 3.10538900  | 1.61031700  |
| H                                                          | -1.60626800 | -3.19235600 | -1.61449500 | N                                      | -1.32417300 | -3.19999800 | -2.37985600 |
| C                                                          | -1.42478200 | -2.97671200 | -0.56826400 | N                                      | -2.54664700 | -3.24342000 | -2.63966700 |
| C                                                          | -1.59900000 | -3.97797500 | 0.40065500  | N                                      | -7.11625500 | -2.21508300 | 0.52057500  |
| C                                                          | -1.04233000 | -1.69893700 | -0.18476300 | N                                      | -7.54781000 | -1.09461100 | 0.87264700  |
| C                                                          | -1.29617800 | -3.70573600 | 1.74112700  | N                                      | -5.52537100 | 3.85127300  | -0.97484000 |
| C                                                          | -0.77590900 | -1.41577800 | 1.16287300  | N                                      | -4.41915900 | 4.34470500  | -0.65737100 |
| H                                                          | -0.94769100 | -0.90940900 | -0.92500100 | N                                      | -0.30456400 | 1.91358200  | 2.35444800  |
| C                                                          | -0.90548000 | -2.42702800 | 2.12764300  | N                                      | 0.94002100  | 1.98322600  | 2.28301800  |
| H                                                          | -1.39705400 | -4.49845400 | 2.47661500  | N                                      | 4.48401400  | 4.15414900  | -1.54256300 |
| H                                                          | -0.71336200 | -2.20635100 | 3.17283000  | N                                      | 5.57155200  | 3.63832500  | -1.87868100 |
| H                                                          | -5.11350100 | -3.02585300 | -3.81727600 | N                                      | 7.44993800  | -1.61166500 | -1.01037500 |
| C                                                          | -4.95802500 | -3.28123700 | -2.77373700 | N                                      | 6.90359300  | -2.60479700 | -0.48155800 |
| C                                                          | -5.65339400 | -2.54965000 | -1.79739400 | N                                      | 2.41505700  | -2.90052600 | 2.92258300  |
| C                                                          | -4.07666300 | -4.29238300 | -2.40825200 | N                                      | 1.22172600  | -3.16762900 | 2.66110400  |
| C                                                          | -5.55300700 | -2.93548900 | -0.45006400 | <b>[6<sub>c</sub>]CPPD<sub>2</sub></b> |             |             |             |
| C                                                          | -3.86999000 | -4.56606300 | -1.05161900 | C                                      | -5.88050300 | 1.63695600  | -0.43792400 |
| H                                                          | -3.51873200 | -4.84549400 | -3.15793500 | C                                      | -4.58384400 | 1.99384100  | -0.83900300 |
| C                                                          | -4.65816800 | -3.93092800 | -0.07998100 | C                                      | -3.49161100 | 1.21450000  | -0.41282400 |
| H                                                          | -6.15368800 | -2.44605100 | 0.30773600  | C                                      | -3.69541900 | 0.11545300  | 0.41145900  |
|                                                            |             |             |             | C                                      | -4.99451700 | -0.22124700 | 0.83688800  |

|   |             |             |             |   |             |             |             |
|---|-------------|-------------|-------------|---|-------------|-------------|-------------|
| H | -4.55339000 | -4.20970300 | 0.96378700  | C | -6.07723600 | 0.57607900  | 0.43497300  |
| C | 5.36826300  | 0.35659200  | -2.80321500 | H | -6.71770500 | 2.22314100  | -0.80388100 |
| C | 4.64816000  | 1.42153400  | -3.36925300 | H | -2.48791900 | 1.46560600  | -0.73830800 |
| C | 4.70382900  | -0.84756100 | -2.51067300 | H | -2.84827300 | -0.47801600 | 0.73782900  |
| C | 3.27639000  | 1.32783600  | -3.56227500 | H | -7.06904900 | 0.32864800  | 0.80039500  |
| H | 5.18779700  | 2.31808600  | -3.65854900 | C | -2.85726900 | 4.14747300  | 0.51526200  |
| C | 3.34592500  | -0.96630200 | -2.77500800 | C | -1.83893300 | 4.53418800  | 1.37485500  |
| H | 5.25874600  | -1.69942500 | -2.13433600 | C | -0.57873600 | 4.91080300  | 0.87763800  |
| C | 2.60940600  | 0.12648600  | -3.26120200 | C | -0.39258700 | 5.02404400  | -0.51144600 |
| H | 2.73364400  | 2.16110800  | -3.99356900 | C | -1.42813400 | 4.68568400  | -1.37093200 |
| H | 2.83184600  | -1.91050600 | -2.62236200 | C | -2.64319200 | 4.18185600  | -0.87397500 |
| C | 0.35624600  | 1.88561500  | -2.87665900 | H | -3.81815200 | 3.84464600  | 0.91525900  |
| C | 0.69782100  | 1.94905800  | -1.51732400 | H | -1.99178700 | 4.54423100  | 2.44950900  |
| C | -0.14740100 | 3.02455100  | -3.52305900 | H | 0.54383100  | 5.39603500  | -0.91112600 |
| C | 0.53414800  | 3.13461700  | -0.81163500 | H | -1.31727100 | 4.79356300  | -2.44536000 |
| H | 1.06465700  | 1.06364200  | -1.00877400 | C | 2.30614600  | 4.43362500  | 0.83862400  |
| C | -0.21970400 | 4.23294100  | -2.84131900 | C | 3.53776100  | 4.97286600  | 0.43629800  |
| H | -0.44423800 | 2.95422700  | -4.56513100 | C | 4.35724200  | 4.27291200  | -0.43817600 |
| C | 0.07888000  | 4.28716800  | -1.47191500 | C | 4.01774700  | 2.97185900  | -0.84002000 |
| H | 0.77730700  | 3.16726400  | 0.24426000  | C | 2.79725500  | 2.41514000  | -0.41293900 |
| H | -0.53791800 | 5.13899700  | -3.34814300 | C | 1.94781200  | 3.14068400  | 0.41222900  |
| H | -4.11037100 | -0.37702700 | -1.03987200 | H | 3.81967100  | 5.95523600  | 0.80224200  |
| C | -4.79264400 | 0.07699300  | -0.32931200 | H | 5.28304800  | 4.70533800  | -0.80471400 |
| C | -6.18062100 | 0.03338000  | -0.55920700 | H | 2.51229000  | 1.42074300  | -0.73906600 |
| C | -4.28558900 | 0.69957800  | 0.80637500  | H | 1.01035100  | 2.70365100  | 0.73863900  |
| C | -7.04633300 | 0.65990100  | 0.35013700  | C | -3.96553000 | -2.95858400 | 0.87498300  |
| C | -5.16342600 | 1.27709700  | 1.74381400  | C | -4.15391900 | -2.85135200 | -0.51430700 |
| H | -3.21346400 | 0.72059800  | 0.98000100  | C | -3.34153800 | -3.57745400 | -1.37359300 |
| C | -6.54782900 | 1.22372000  | 1.51608400  | C | -2.29889200 | -4.37903800 | -0.87601600 |
| H | -8.11158600 | 0.65940600  | 0.14026100  | C | -2.16539000 | -4.55049000 | 0.51315200  |
| H | -7.21536100 | 1.64408400  | 2.26210600  | C | -3.01101600 | -3.86338600 | 1.37239000  |
| C | -3.01766000 | 3.23365100  | 2.39876100  | H | -4.94300600 | -2.22508700 | -0.91446300 |
| C | -1.79248300 | 3.64578200  | 2.95243000  | H | -3.48819000 | -3.53318200 | -2.44823900 |
| C | -3.38525100 | 3.71022900  | 1.12751200  | H | -1.42386500 | -5.23247200 | 0.91318800  |
| C | -0.92426000 | 4.46273600  | 2.24337100  | H | -2.94573400 | -4.00304300 | 2.44690000  |
| H | -1.55528600 | 3.31793700  | 3.95918900  | C | 0.69368400  | -3.62959000 | -0.41000400 |
| C | -2.50538100 | 4.50399300  | 0.40119000  | C | 1.74676600  | -3.25640700 | 0.41493500  |
| H | -4.35351400 | 3.47108600  | 0.70570000  | C | 2.68829500  | -4.21275000 | 0.84023500  |



|                                        |             |             |             |                                        |             |             |             |
|----------------------------------------|-------------|-------------|-------------|----------------------------------------|-------------|-------------|-------------|
| C                                      | -1.25924900 | 4.85842100  | 0.94276300  | C                                      | 2.54038400  | -5.54881300 | 0.43713700  |
| H                                      | 0.01279900  | 4.79515700  | 2.67958700  | C                                      | 1.52422800  | -5.90878900 | -0.43694600 |
| H                                      | -2.78761900 | 4.87185700  | -0.58033500 | C                                      | 0.56615100  | -4.96478900 | -0.83768800 |
| C                                      | 1.51591400  | -0.34339400 | 2.59453200  | H                                      | -0.02571700 | -2.88592800 | -0.73528200 |
| C                                      | 2.12407500  | 0.09856100  | 3.78060600  | H                                      | 1.83644800  | -2.22608600 | 0.74174200  |
| C                                      | 2.16804400  | -1.31060900 | 1.80547500  | H                                      | 3.25114200  | -6.28373200 | 0.80206300  |
| C                                      | 3.33460500  | -0.43877400 | 4.19759000  | H                                      | 1.43648500  | -6.92656100 | -0.80422400 |
| H                                      | 1.62242100  | 0.86423700  | 4.36434500  | C                                      | 4.76713400  | -1.10592300 | -1.37378600 |
| C                                      | 3.40833900  | -1.80039600 | 2.18868000  | C                                      | 4.94207800  | 0.19797400  | -0.87743800 |
| H                                      | 1.72550500  | -1.65286400 | 0.87807700  | C                                      | 5.02430700  | 0.40066900  | 0.51150600  |
| C                                      | 4.01245900  | -1.34944400 | 3.37475900  | C                                      | 4.85205500  | -0.67440600 | 1.37177900  |
| H                                      | 3.79250000  | -0.13053900 | 5.13235200  | C                                      | 4.54478600  | -1.95375800 | 0.87570100  |
| H                                      | 3.91875800  | -2.52874100 | 1.56749900  | C                                      | 4.54409700  | -2.17150300 | -0.51344600 |
| N                                      | 0.09135200  | 5.57816900  | -0.85013500 | H                                      | 4.80104400  | -1.25606900 | -2.44833100 |
| N                                      | -0.41501600 | 5.80017500  | 0.26926600  | H                                      | 5.24512800  | 1.38410200  | 0.91040000  |
| N                                      | -3.82325100 | 2.49634000  | 3.32018100  | H                                      | 4.94124100  | -0.54720800 | 2.44611200  |
| N                                      | -4.77672900 | 1.73622900  | 3.03908600  | H                                      | 4.39502600  | -3.16813900 | -0.91268000 |
| N                                      | -6.80701000 | -0.46832800 | -1.74419500 | N                                      | -5.30682600 | -1.22344300 | 1.80606500  |
| N                                      | -6.53492200 | -1.54952400 | -2.31501800 | N                                      | -4.80149000 | -2.36686800 | 1.86915600  |
| N                                      | -2.93193500 | -5.58739000 | -0.67860300 | N                                      | -1.58286900 | -5.11112500 | -1.87031400 |
| N                                      | -1.94880500 | -5.32696600 | 0.05103100  | N                                      | -0.37424200 | -5.43047800 | -1.80716200 |
| N                                      | -0.58019200 | -0.04116100 | 1.50675100  | N                                      | 3.71231500  | -3.98159700 | 1.80924600  |
| N                                      | 0.35869700  | 0.40004900  | 2.20608500  | N                                      | 4.45009400  | -2.97229100 | 1.87118000  |
| N                                      | 5.23821900  | -1.88796200 | 3.87260400  | N                                      | 4.89055600  | 2.38981900  | -1.80988500 |
| N                                      | 6.28520000  | -1.99559200 | 3.19531100  | N                                      | 5.21779400  | 1.18326500  | -1.87267800 |
| N                                      | 7.54679300  | 0.04626600  | -1.91328100 | N                                      | 0.35169700  | 5.33799000  | 1.87220300  |
| N                                      | 6.79196700  | 0.50005500  | -2.79932400 | N                                      | 1.59463900  | 5.20438600  | 1.80856900  |
| N                                      | 1.26259400  | -0.16494700 | -3.64757600 | N                                      | -4.51628300 | 3.04255300  | -1.80695500 |
| N                                      | 0.30934200  | 0.64185300  | -3.58057100 | N                                      | -3.63495600 | 3.92930700  | -1.86886600 |
| <b>[7<sub>c</sub>]CPPD<sub>2</sub></b> |             |             |             | <b>[8<sub>c</sub>]CPPD<sub>2</sub></b> |             |             |             |
| C                                      | -5.60965400 | 2.63577700  | -0.75134400 | C                                      | -2.84732400 | -4.91259000 | -1.02814700 |
| C                                      | -6.99050300 | 2.41563400  | -0.89708000 | C                                      | -2.60107900 | -4.16807600 | 0.13774000  |
| C                                      | -7.58142000 | 1.25077100  | -0.42870800 | C                                      | -1.97387900 | -2.91085000 | 0.02309300  |
| C                                      | -6.78733600 | 0.23654100  | 0.12620900  | C                                      | -1.60970500 | -2.42345800 | -1.22436400 |
| C                                      | -5.40255200 | 0.44302400  | 0.26804200  | C                                      | -1.85121700 | -3.17933600 | -2.38524100 |
| C                                      | -4.81864600 | 1.62640800  | -0.16328800 | C                                      | -2.43518200 | -4.44948500 | -2.27069400 |
| H                                      | -7.58030200 | 3.19244000  | -1.37298300 | H                                      | -3.35991200 | -5.86422100 | -0.92832300 |
| H                                      | -8.65400700 | 1.09833700  | -0.49637700 | H                                      | -1.80346300 | -2.29696800 | 0.89727000  |

|   |             |             |             |   |             |             |             |
|---|-------------|-------------|-------------|---|-------------|-------------|-------------|
| H | -4.78564200 | -0.32194300 | 0.72615800  | H | -1.14235900 | -1.44795400 | -1.30833400 |
| H | -3.74997800 | 1.74784900  | -0.05635400 | H | -2.58512900 | -5.04285400 | -3.16727900 |
| C | 5.52092900  | -2.66251400 | 0.54993800  | C | -1.64539300 | -3.76628500 | 2.84354800  |
| C | 4.33946600  | -2.23873400 | -0.08421100 | C | -0.35590000 | -4.27606500 | 2.61558900  |
| C | 3.15884800  | -2.12458400 | 0.63661800  | C | -1.81047400 | -2.59659700 | 3.59875800  |
| C | 3.14192300  | -2.40832400 | 2.01535800  | C | 0.75979100  | -3.56732200 | 3.04284500  |
| C | 4.32871900  | -2.81817700 | 2.64518200  | H | -0.23741900 | -5.22470500 | 2.10115600  |
| C | 5.49349900  | -2.99778200 | 1.91110500  | C | -0.69338600 | -1.88854300 | 4.02217700  |
| H | 4.34706600  | -2.01128600 | -1.14428400 | H | -2.80982100 | -2.24318300 | 3.83270300  |
| H | 2.25917300  | -1.79415100 | 0.13194300  | C | 0.60099300  | -2.33333600 | 3.70023100  |
| H | 4.30771000  | -2.99989500 | 3.71519500  | H | 1.74869200  | -3.97315200 | 2.86394500  |
| H | 6.40138200  | -3.36191600 | 2.38205200  | H | -0.81194900 | -0.97134800 | 4.59046700  |
| C | -0.62652800 | -1.98335100 | 0.70502000  | H | -3.96845200 | -1.76963600 | -2.85823200 |
| C | -1.30798200 | -2.51923700 | -0.37942600 | C | -3.56248200 | -0.78180400 | -3.04260700 |
| C | -1.09633300 | -3.85900500 | -0.74931900 | C | -2.32763000 | -0.62686400 | -3.69923800 |
| C | -0.14420900 | -4.62231400 | -0.05602200 | C | -4.27208500 | 0.33639900  | -2.62340600 |
| C | 0.54170400  | -4.08739400 | 1.02803400  | C | -1.88274800 | 0.66553600  | -4.02891500 |
| C | 0.31301500  | -2.75523900 | 1.40769100  | C | -3.76227300 | 1.62453100  | -2.85879200 |
| H | -0.80708900 | -0.96019000 | 1.02237700  | H | -5.22151000 | 0.22090600  | -2.10973300 |
| H | -2.00762800 | -1.90489500 | -0.93518900 | C | -2.59164700 | 1.78512200  | -3.61354200 |
| H | 0.03882900  | -5.64275100 | -0.37943100 | H | -0.96491600 | 0.78070900  | -4.59685800 |
| H | 1.25487200  | -4.69200200 | 1.57924600  | H | -2.23839100 | 2.78306000  | -3.85366800 |
| C | -5.20626700 | -3.51101300 | 0.51964000  | C | -4.16880500 | 2.59872400  | -0.16011100 |
| C | -6.00386200 | -2.53677100 | -0.10210000 | C | -2.91145300 | 1.97296700  | -0.03915800 |
| C | -5.78709300 | -2.22202400 | -1.45408000 | C | -4.91510500 | 2.85296700  | 1.00290000  |
| C | -4.74520500 | -2.82964900 | -2.14361100 | C | -2.42546900 | 1.61831300  | 1.21160300  |
| C | -3.86385700 | -3.69810200 | -1.47966500 | H | -2.29636900 | 1.79644600  | -0.91126400 |
| C | -4.12066700 | -4.06194400 | -0.14714800 | C | -4.45351700 | 2.45003300  | 2.24901500  |
| H | -5.44057500 | -3.80328300 | 1.53853500  | H | -5.86688500 | 3.36428200  | 0.89808400  |
| H | -6.44579700 | -1.52725200 | -1.96425200 | C | -3.18307600 | 1.86791000  | 2.36963300  |
| H | -4.58411800 | -2.62634000 | -3.19788100 | H | -1.44974500 | 1.15230100  | 1.30027600  |
| H | -3.48526600 | -4.78721700 | 0.34973100  | H | -5.04819800 | 2.60615900  | 3.14367600  |
| N | 2.05785100  | -2.14532100 | 2.90908900  | C | -0.63201100 | 2.35501900  | 3.68409400  |
| N | 0.84523300  | -2.20196800 | 2.61145500  | C | 0.65964500  | 1.91226300  | 4.01953300  |
| N | -1.66665000 | -4.47468200 | -1.90825400 | C | -0.78531700 | 3.58498200  | 3.01784900  |
| N | -2.85433700 | -4.32489600 | -2.27434100 | C | 1.78023300  | 2.61756900  | 3.60080800  |
| N | -7.49580900 | -0.87132300 | 0.68860600  | H | 0.77341300  | 0.99882000  | 4.59481500  |
| N | -7.10976100 | -2.06065300 | 0.66549600  | C | 0.33390100  | 4.29080900  | 2.59502200  |

|   |             |             |             |   |             |             |             |
|---|-------------|-------------|-------------|---|-------------|-------------|-------------|
| N | -4.10133000 | 4.45213100  | -1.14636600 | H | -1.77263200 | 3.98998800  | 2.82867000  |
| N | -5.19301600 | 3.87351300  | -1.33861500 | C | 1.62141900  | 3.78230500  | 2.83666700  |
| C | -3.10305700 | 4.06720000  | -0.20676300 | H | 2.77761700  | 2.26589100  | 3.84552100  |
| C | -3.29754000 | 4.19045900  | 1.17763300  | H | 0.21973500  | 5.23616300  | 2.07360200  |
| C | -2.25238900 | 3.88602600  | 2.03870000  | C | 2.59926200  | 4.16900000  | 0.13660200  |
| C | -0.99160300 | 3.49067600  | 1.55402600  | C | 2.85423600  | 4.90752100  | -1.03120900 |
| C | -0.79396200 | 3.41849600  | 0.15968200  | C | 1.97414100  | 2.91057900  | 0.02347000  |
| C | -1.83742400 | 3.72080700  | -0.70572100 | C | 2.45243200  | 4.43750100  | -2.27453200 |
| H | -4.26601100 | 4.49204400  | 1.56409400  | H | 3.36520600  | 5.86012600  | -0.93235900 |
| H | -2.38839000 | 3.92440300  | 3.11506400  | C | 1.62060400  | 2.41617100  | -1.22431400 |
| H | 0.15609400  | 3.11701700  | -0.25705500 | H | 1.79704300  | 2.30106000  | 0.89941100  |
| H | -1.69095200 | 3.67240700  | -1.78060100 | C | 1.87074200  | 3.16611500  | -2.38721200 |
| C | 2.35733800  | 2.02690900  | 0.58226800  | H | 2.60913000  | 5.02628000  | -3.17299000 |
| C | 3.29508900  | 2.19948600  | -0.42787800 | H | 1.15492300  | 1.43975000  | -1.30675000 |
| C | 3.86761000  | 3.46621400  | -0.65444100 | C | 3.16227400  | -1.85623300 | 2.40304100  |
| C | 3.41934700  | 4.55572400  | 0.11066700  | C | 4.43409000  | -2.43806300 | 2.29618400  |
| C | 2.48009100  | 4.39028300  | 1.12129000  | C | 2.41393600  | -1.61444800 | 1.23736500  |
| C | 1.93438900  | 3.12069200  | 1.35692600  | C | 4.90620400  | -2.84789700 | 1.05625900  |
| H | 1.93804300  | 1.04433300  | 0.77873800  | H | 5.02182300  | -2.58793800 | 3.19648900  |
| H | 3.57781100  | 1.34960100  | -1.03590700 | C | 2.91031000  | -1.97619800 | -0.00727100 |
| H | 3.83180200  | 5.53569600  | -0.10925600 | H | 1.43731400  | -1.14838100 | 1.31519700  |
| H | 2.16135200  | 5.23346400  | 1.72619800  | C | 4.16927800  | -2.60128200 | -0.11436900 |
| C | 6.68976900  | 0.10387700  | -0.22808300 | H | 5.85941300  | -3.35863700 | 0.96220100  |
| C | 6.75407200  | -0.85532600 | -1.25176200 | H | 2.30208500  | -1.80503000 | -0.88527100 |
| C | 6.51823300  | -0.47235000 | -2.57926900 | C | 2.35968600  | 0.60690500  | -3.68497900 |
| C | 6.11047300  | 0.82483400  | -2.86329700 | C | 1.91891600  | -0.68714000 | -4.01387200 |
| C | 5.95089100  | 1.76234000  | -1.83012800 | C | 3.58793500  | 0.76524300  | -3.01683800 |
| C | 6.30244000  | 1.40728300  | -0.51693600 | C | 2.62435400  | -1.80459200 | -3.58708200 |
| H | 6.94647900  | -0.17347600 | 0.78938200  | H | 1.00694500  | -0.80518400 | -4.59061900 |
| H | 6.64587100  | -1.20385500 | -3.37150000 | C | 4.29386800  | -0.35083100 | -2.58591500 |
| H | 5.91227700  | 1.13621500  | -3.88426000 | H | 3.99137300  | 1.75407800  | -2.83224200 |
| H | 6.25721100  | 2.14684200  | 0.27587600  | C | 3.78725200  | -1.64020600 | -2.82131300 |
| N | -0.10644200 | 3.10151300  | 2.60813800  | H | 2.27418400  | -2.80371500 | -3.82681900 |
| N | 1.12176700  | 2.89841700  | 2.50850000  | H | 5.23792900  | -0.23273700 | -2.06305200 |
| N | 4.78083700  | 3.83887000  | -1.69040300 | N | -1.36094500 | -2.80430900 | -3.67315200 |
| N | 5.62327700  | 3.09150400  | -2.23955300 | N | -1.50113600 | -1.67716200 | -4.20295100 |
| N | 6.72784700  | -2.94897600 | -0.16472000 | N | -4.51389200 | 2.78729400  | -2.51284900 |
| N | 7.22071100  | -2.19012500 | -1.02785500 | N | -4.74486500 | 3.16365500  | -1.34294900 |

|  |   |             |             |             |
|--|---|-------------|-------------|-------------|
|  | N | -2.80954600 | 1.38791500  | 3.66187400  |
|  | N | -1.68318500 | 1.53237800  | 4.19222400  |
|  | N | 2.78520100  | 4.53054700  | 2.48692100  |
|  | N | 3.16301200  | 4.75333100  | 1.31590500  |
|  | N | 1.39166500  | 2.78407200  | -3.67732400 |
|  | N | 1.53717800  | 1.65453400  | -4.20057000 |
|  | N | 4.53578400  | -2.80116800 | -2.46294200 |
|  | N | 4.75620000  | -3.17177900 | -1.28917800 |
|  | N | 2.77870200  | -1.36702900 | 3.68884300  |
|  | N | 1.64816500  | -1.50747700 | 4.21130300  |
|  | N | -2.80625900 | -4.51656200 | 2.48847100  |
|  | N | -3.17461700 | -4.74570700 | 1.31564300  |

**Table S2:** Optimized geometries of tran-cyclic [n<sub>t</sub>]paraphenylenediazenes obtained using the B3LYP/6-31+G(d,p).

| <b>[2<sub>t</sub>]CPPD</b> |             |             |             | <b>[3<sub>t</sub>]CPPD</b> |             |             |             |
|----------------------------|-------------|-------------|-------------|----------------------------|-------------|-------------|-------------|
| C                          | -1.39335500 | 1.35069800  | 0.25092300  | C                          | 2.53770200  | -1.47719500 | -0.01963500 |
| C                          | -2.46738800 | 0.67977700  | -0.52195000 | C                          | 1.71380300  | -1.37101900 | 1.18483400  |
| C                          | -1.01511900 | 0.66949200  | 1.50500000  | C                          | 2.26365400  | -2.61353800 | -0.90427300 |
| C                          | -2.46767700 | -0.67879500 | -0.52201600 | C                          | 0.54008000  | -2.02433400 | 1.26167800  |
| H                          | -3.08399400 | 1.25212600  | -1.20766300 | H                          | 2.07454400  | -0.75109500 | 1.99870000  |
| C                          | -1.01543000 | -0.66929600 | 1.50496100  | C                          | 1.07061300  | -3.25680500 | -0.83750500 |
| H                          | -0.65817900 | 1.26558800  | 2.33859900  | H                          | 2.98518400  | -2.83578000 | -1.68423200 |
| C                          | -1.39397100 | -1.35025400 | 0.25084500  | C                          | 0.06127600  | -2.83090800 | 0.13353200  |
| H                          | -3.08452100 | -1.25081800 | -1.20778600 | H                          | -0.09150500 | -1.95645100 | 2.13952300  |
| H                          | -0.65875100 | -1.26560400 | 2.33852100  | H                          | 0.79412300  | -4.01553200 | -1.56295600 |
| C                          | 1.39331900  | -1.35068900 | -0.25087600 | C                          | -2.62335900 | -1.34342300 | 0.37401000  |
| C                          | 2.46722800  | -0.67976900 | 0.52217200  | C                          | -2.81743600 | -0.97255900 | -1.03251100 |
| C                          | 1.01533200  | -0.66951700 | -1.50504700 | C                          | -2.95045600 | -0.32896400 | 1.37992200  |
| C                          | 2.46754200  | 0.67880300  | 0.52218700  | C                          | -2.95055400 | 0.32769100  | -1.37987500 |
| H                          | 3.08372500  | -1.25211300 | 1.20798900  | H                          | -2.83788600 | -1.76761800 | -1.77034900 |
| C                          | 1.01565900  | 0.66926900  | -1.50504500 | C                          | -2.81797300 | 0.97135400  | 1.03256300  |
| H                          | 0.65856300  | -1.26563200 | -2.33870600 | H                          | -3.07829000 | -0.64349000 | 2.41104600  |
| C                          | 1.39397300  | 1.35025300  | -0.25087200 | C                          | -2.62402000 | 1.34231800  | -0.37394900 |
| H                          | 3.08429600  | 1.25084000  | 1.20802700  | H                          | -3.07849600 | 0.64215300  | -2.41100500 |
| H                          | 0.65916700  | 1.26555900  | -2.33869800 | H                          | -2.83884700 | 1.76640300  | 1.77039900  |
| N                          | 0.63226100  | 2.24963000  | 0.30582300  | H                          | -0.09285600 | 1.95563800  | -2.13923100 |
| N                          | -0.63136100 | 2.24978900  | -0.30586300 | C                          | 0.53886700  | 2.02412100  | -1.26153000 |
| N                          | -0.63230800 | -2.24956800 | -0.30600400 | C                          | 0.05993200  | 2.83091700  | -0.13360000 |
| N                          | 0.63126800  | -2.24982000 | 0.30576300  | C                          | 1.71287400  | 1.37131900  | -1.18465000 |
| <b>[4<sub>t</sub>]CPPD</b> |             |             |             | C                          | 1.06926100  | 3.25760800  | 0.83709200  |
| C                          | -3.92218900 | 0.37558100  | -0.21851600 | C                          | 2.53694100  | 1.47829500  | 0.01963500  |
| C                          | -3.93363200 | -0.18471400 | 1.13295100  | H                          | 2.07371900  | 0.75121900  | -1.99833700 |
| C                          | -3.92294900 | -0.56579000 | -1.33118900 | C                          | 2.26257700  | 2.61485600  | 0.90389500  |
| C                          | -3.66942600 | -1.49824100 | 1.33119400  | H                          | 0.79256500  | 4.01646800  | 1.56232700  |
| H                          | -4.13206300 | 0.48587200  | 1.96029200  | H                          | 2.98413700  | 2.83766800  | 1.68366400  |
| C                          | -3.48575300 | -1.83228900 | -1.13294700 | N                          | 3.40615100  | 0.57008300  | 0.37378100  |
| H                          | -4.11967400 | -0.17694600 | -2.32558700 | N                          | 3.40650400  | -0.56850800 | -0.37358600 |
| C                          | -3.19218100 | -2.30966400 | 0.21851700  | N                          | -1.21013800 | -3.07001300 | -0.07617700 |
| H                          | -3.64218000 | -1.93315700 | 2.32559600  | N                          | -1.99411900 | -2.39319900 | 0.82048500  |
| H                          | -3.31737000 | -2.51104400 | -1.96028900 | N                          | -1.99529200 | 2.39241100  | -0.82039000 |

|   |             |             |             |                            |             |             |             |
|---|-------------|-------------|-------------|----------------------------|-------------|-------------|-------------|
| C | -0.37558000 | -3.92218500 | -0.21851900 | N                          | -1.21154800 | 3.06951400  | 0.07626700  |
| C | 0.56579200  | -3.92293900 | -1.33119100 | <b>[5<sub>t</sub>]CPPD</b> |             |             |             |
| C | 0.18471400  | -3.93363100 | 1.13294800  | C                          | 3.46389200  | -3.67956700 | -0.18581900 |
| C | 1.83229100  | -3.48574200 | -1.13294700 | C                          | 3.83622900  | -3.28692400 | 1.11848300  |
| H | 0.17695000  | -4.11966100 | -2.32559000 | C                          | 4.54992900  | -2.11248900 | 1.29549900  |
| C | 1.49824100  | -3.66942500 | 1.33119400  | C                          | 4.88295500  | -1.30191100 | 0.18569300  |
| H | -0.48587300 | -4.13206500 | 1.96028800  | C                          | 4.71412200  | -1.81601400 | -1.11861000 |
| C | 2.30966400  | -3.19217600 | 0.21851900  | C                          | 4.01923700  | -3.00167800 | -1.29562400 |
| H | 2.51104500  | -3.31735400 | -1.96028700 | H                          | 3.44862900  | -3.83309900 | 1.97042200  |
| H | 1.93315500  | -3.64218100 | 2.32559600  | H                          | 4.73738700  | -1.72189300 | 2.29097300  |
| C | 3.92219100  | -0.37558200 | -0.21851800 | H                          | 5.01084800  | -1.21560300 | -1.97055000 |
| C | 3.93363900  | 0.18471500  | 1.13294800  | H                          | 3.76444600  | -3.35208600 | -2.29109800 |
| C | 3.92294500  | 0.56578900  | -1.33119100 | C                          | 4.56990100  | 2.15730300  | -0.18578300 |
| C | 3.66943100  | 1.49824100  | 1.33119200  | C                          | 4.31151700  | 2.63270400  | 1.11853400  |
| H | 4.13207500  | -0.48587100 | 1.96029000  | C                          | 4.09679500  | 2.89497800  | -1.29556700 |
| C | 3.48574700  | 1.83228700  | -1.13294900 | C                          | 3.41508600  | 3.67436800  | 1.29558000  |
| H | 4.11966700  | 0.17694400  | -2.32559000 | H                          | 4.71118900  | 2.09527500  | 1.97045600  |
| C | 3.19218000  | 2.30966200  | 0.21851600  | C                          | 3.18388300  | 3.92223000  | -1.11852200 |
| H | 3.64218800  | 1.93315800  | 2.32559300  | H                          | 4.35133100  | 2.54441300  | -2.29105100 |
| H | 3.31736000  | 2.51104100  | -1.96029000 | C                          | 2.74709700  | 4.24161000  | 0.18578900  |
| H | 0.48587100  | 4.13207000  | 1.96028800  | H                          | 3.10151900  | 3.97330900  | 2.29106100  |
| C | -0.18471600 | 3.93363400  | 1.13294800  | H                          | 2.70455800  | 4.39000000  | -1.97044800 |
| C | 0.37558000  | 3.92218500  | -0.21851900 | C                          | -0.63954400 | 5.01286200  | -0.18570000 |
| C | -1.49824200 | 3.66942800  | 1.33119300  | C                          | -1.48728400 | 4.79084100  | -1.29549900 |
| C | -0.56579200 | 3.92293700  | -1.33119200 | C                          | -1.17155300 | 4.91405700  | 1.11860700  |
| C | -2.30966500 | 3.19217700  | 0.21851800  | C                          | -2.74636600 | 4.24004800  | -1.11847500 |
| H | -1.93315800 | 3.64218500  | 2.32559400  | H                          | -1.07519400 | 4.92456500  | -2.29097500 |
| C | -1.83229000 | 3.48574100  | -1.13294800 | C                          | -2.43925400 | 4.38340100  | 1.29563300  |
| H | -0.17694800 | 4.11965800  | -2.32559100 | H                          | -0.53693700 | 5.12810200  | 1.97053900  |
| H | -2.51104400 | 3.31735300  | -1.96028900 | C                          | -3.18512800 | 3.92337100  | 0.18583200  |
| N | -3.30491600 | 2.38949300  | 0.52837900  | H                          | -3.33933400 | 3.92869800  | -1.97040800 |
| N | -3.73387800 | 1.64024200  | -0.52837900 | H                          | -2.82048700 | 4.17757900  | 2.29110800  |
| N | -2.38949500 | -3.30491700 | 0.52837400  | C                          | -4.96517200 | 0.94082400  | -0.18571000 |
| N | -1.64024200 | -3.73387600 | -0.52838300 | C                          | -5.03562100 | 0.40429300  | 1.11858500  |
| N | 3.30491600  | -2.38949100 | 0.52838000  | C                          | -5.01598600 | 0.06599100  | -1.29553000 |
| N | 3.73388100  | -1.64024300 | -0.52837800 | C                          | -4.92267600 | -0.96534700 | 1.29558200  |
| N | 2.38949200  | 3.30491300  | 0.52837600  | H                          | -5.04311300 | 1.07397300  | 1.97053100  |
| N | 1.64024200  | 3.73387600  | -0.52838100 | C                          | -4.88122100 | -1.30167400 | -1.11853300 |

| <b>[6<sub>t</sub>]CPPD</b> |             |             |             |                            |             |             |             |
|----------------------------|-------------|-------------|-------------|----------------------------|-------------|-------------|-------------|
| C                          | 1.89241600  | 5.75289500  | 0.18530100  | H                          | -5.01582100 | 0.49925800  | -2.29099600 |
| C                          | 2.39337100  | 5.56040100  | -1.11792300 | C                          | -4.71561900 | -1.81684400 | 0.18576500  |
| C                          | 3.57159100  | 4.84958400  | -1.29468200 | H                          | -4.84475100 | -1.39154600 | 2.29104900  |
| C                          | 4.25571500  | 4.30893000  | -0.18540500 | H                          | -4.76835100 | -1.96181700 | -1.97047800 |
| C                          | 3.85584400  | 4.66687000  | 1.11781700  | H                          | -2.57980600 | -4.46430700 | 1.97045900  |
| C                          | 2.68569100  | 5.39089300  | 1.29457500  | C                          | -1.94059200 | -4.66416600 | 1.11851900  |
| H                          | 1.79748000  | 5.86892300  | -1.96879600 | C                          | -2.42909400 | -4.43140600 | -0.18578300 |
| H                          | 3.92168100  | 4.59237000  | -2.28960800 | C                          | -0.60308900 | -4.97999600 | 1.29552800  |
| H                          | 4.40230100  | 4.27744200  | 1.96869200  | C                          | -1.61277500 | -4.75009300 | -1.29559200 |
| H                          | 2.29707400  | 5.58505000  | 2.28950100  | C                          | 0.27071900  | -5.04623800 | 0.18571500  |
| H                          | -3.68830200 | 4.78189600  | 2.28951300  | H                          | -0.17367100 | -5.03756100 | 2.29099700  |
| C                          | -3.32584900 | 5.02134000  | 1.29457900  | C                          | -0.27040400 | -5.04455700 | -1.11858400 |
| C                          | -4.03602400 | 4.51535700  | 0.18531900  | H                          | -2.02477800 | -4.61606700 | -2.29106300 |
| C                          | -2.11372300 | 5.67265300  | 1.11779800  | H                          | 0.39231200  | -5.14122300 | -1.97052600 |
| C                          | -3.61884300 | 4.85291800  | -1.11791400 | N                          | 5.04459900  | 0.06125000  | 0.49834100  |
| C                          | -1.60381300 | 5.83994300  | -0.18543200 | N                          | 4.97361400  | 0.84530600  | -0.49845600 |
| H                          | -1.50322100 | 5.95117500  | 1.96866100  | N                          | 1.50059900  | 4.81656300  | 0.49845000  |
| C                          | -2.41411900 | 5.51782300  | -1.29469500 | N                          | 0.73299800  | 4.99138300  | -0.49835200 |
| H                          | -4.18400000 | 4.49113300  | -1.96877700 | N                          | -4.11713800 | 2.91555300  | 0.49847800  |
| H                          | -2.01632700 | 5.69237700  | -2.28962800 | N                          | -4.52060300 | 2.23955800  | -0.49833500 |
| C                          | 5.92845800  | 1.23760000  | 0.18537100  | N                          | -4.04512900 | -3.01467100 | 0.49839400  |
| C                          | 6.01225600  | 0.70750900  | -1.11785100 | N                          | -3.52688000 | -3.60726600 | -0.49841900 |
| C                          | 6.01152900  | 0.36960000  | 1.29464800  | N                          | 1.61711000  | -4.77871200 | 0.49835000  |
| C                          | 5.98574200  | -0.66826800 | -1.29460900 | N                          | 2.34084800  | -4.46894200 | -0.49846300 |
| H                          | 5.98154500  | 1.37782600  | -1.96872600 | <b>[7<sub>t</sub>]CPPD</b> |             |             |             |
| C                          | 5.96954400  | -1.00579100 | 1.11789000  | C                          | 6.89045500  | 0.86249300  | -0.71832600 |
| H                          | 5.98534500  | 0.80323300  | 2.28957300  | C                          | 6.57729300  | 2.20870000  | -0.71059400 |
| C                          | 5.85952400  | -1.53105700 | -0.18533500 | C                          | 6.36841000  | 2.88019100  | 0.51842900  |
| H                          | 5.93805400  | -1.10006100 | -2.28953500 | C                          | 6.64054000  | 2.21355800  | 1.72589100  |
| H                          | 5.90546700  | -1.67375000 | 1.96876300  | C                          | 6.95453600  | 0.85871700  | 1.71814000  |
| C                          | 4.03602500  | -4.51535300 | 0.18539700  | C                          | 7.00201700  | 0.15393200  | 0.50265800  |
| C                          | 3.32585100  | -5.02131600 | 1.29466600  | H                          | 6.95662500  | 0.31393300  | -1.65082300 |
| C                          | 3.61884200  | -4.85293700 | -1.11783000 | H                          | 6.39227000  | 2.74025400  | -1.63688100 |
| C                          | 2.11372500  | -5.67263300 | 1.11789700  | H                          | 6.49537900  | 2.74864800  | 2.65883500  |
| H                          | 3.68830500  | -4.78185600 | 2.28959500  | H                          | 7.06172200  | 0.30419700  | 2.64486900  |
| C                          | 2.41411800  | -5.51784400 | -1.29459800 | H                          | 6.45367500  | -3.38645800 | -2.51566200 |
| H                          | 4.18399900  | -4.49116700 | -1.96870000 | C                          | 6.04182700  | -3.82059000 | -1.61026600 |
|                            |             |             |             | C                          | 6.28558200  | -3.17795500 | -0.38409400 |

|                                                 |             |             |             |   |             |             |             |
|-------------------------------------------------|-------------|-------------|-------------|---|-------------|-------------|-------------|
| C                                               | 1.60381300  | -5.83994500 | -0.18532900 | C | 5.17909000  | -4.91041200 | -1.66618500 |
| H                                               | 1.50322300  | -5.95113900 | 1.96876700  | C | 5.77936200  | -3.74360600 | 0.81149500  |
| H                                               | 2.01632400  | -5.69241500 | -2.28952700 | C | 4.54523200  | -5.36681500 | -0.49749800 |
| C                                               | -1.89241700 | -5.75289100 | 0.18540600  | H | 4.89764800  | -5.35269900 | -2.61641000 |
| C                                               | -2.39337200 | -5.56042100 | -1.11782200 | C | 4.91920300  | -4.82379900 | 0.75556500  |
| C                                               | -2.68569200 | -5.39086800 | 1.29467300  | H | 5.99803400  | -3.25719800 | 1.75510800  |
| C                                               | -3.57159300 | -4.84960800 | -1.29459300 | H | 4.44767700  | -5.20407100 | 1.65428800  |
| H                                               | -1.79748200 | -5.86895800 | -1.96869000 | H | 4.02276300  | 5.54162600  | 1.82713700  |
| C                                               | -3.85584500 | -4.66685100 | 1.11790300  | C | 3.58304300  | 5.86921200  | 0.89219100  |
| H                                               | -2.29707300 | -5.58500700 | 2.28960300  | C | 2.33722500  | 6.46731100  | 0.86798500  |
| C                                               | -4.25571600 | -4.30893500 | -0.18532600 | C | 4.24467500  | 5.56144400  | -0.32131400 |
| H                                               | -3.92168500 | -4.59241300 | -2.28952300 | C | 1.72162700  | 6.77231600  | -0.37026400 |
| H                                               | -4.40230300 | -4.27740800 | 1.96877100  | H | 1.77739200  | 6.61962000  | 1.78351900  |
| H                                               | -5.98154400 | -1.37786200 | -1.96869900 | C | 3.70384100  | 6.01296500  | -1.53785300 |
| C                                               | -6.01225600 | -0.70753000 | -1.11783500 | C | 2.44993000  | 6.61418000  | -1.56225200 |
| C                                               | -5.92845800 | -1.23759800 | 0.18539500  | H | 4.23361100  | 5.78680600  | -2.45762300 |
| C                                               | -5.98574000 | 0.66824400  | -1.29461800 | H | 1.97127700  | 6.87149800  | -2.50165500 |
| C                                               | -6.01152900 | -0.36957800 | 1.29465800  | H | 1.41049800  | -6.86280900 | -2.05338600 |
| C                                               | -5.85952200 | 1.53105300  | -0.18536000 | C | 0.78975400  | -6.90597300 | -1.16622800 |
| H                                               | -5.93805100 | 1.10001900  | -2.28955300 | C | 1.39515300  | -6.82354800 | 0.10486200  |
| C                                               | -5.96954300 | 1.00581100  | 1.11787400  | C | -0.59333600 | -6.90736600 | -1.26304200 |
| H                                               | -5.98534500 | -0.80319300 | 2.28959000  | C | 0.59335100  | -6.90736500 | 1.26304200  |
| H                                               | -5.90546500 | 1.67378400  | 1.96873500  | C | -1.39513800 | -6.82355100 | -0.10486200 |
| N                                               | -0.24018600 | 6.04206700  | -0.49777100 | H | -1.08368000 | -6.86881200 | -2.23089500 |
| N                                               | 0.54053500  | 6.02263200  | 0.49763200  | C | -0.78973900 | -6.90597400 | 1.16622800  |
| N                                               | 5.11259900  | 3.22907000  | -0.49772400 | H | 1.08369400  | -6.86881000 | 2.23089500  |
| N                                               | 5.48612000  | 2.54323800  | 0.49768700  | H | -1.41048300 | -6.86281200 | 2.05338600  |
| N                                               | 5.35277100  | -2.81306400 | -0.49766900 | C | -4.54522100 | -5.36682500 | 0.49749800  |
| N                                               | 4.94557800  | -3.47947100 | 0.49773200  | C | -4.91919300 | -4.82381000 | -0.75556500 |
| N                                               | 0.24018500  | -6.04207300 | -0.49766300 | C | -5.17907900 | -4.91042300 | 1.66618500  |
| N                                               | -0.54053500 | -6.02261900 | 0.49774000  | C | -5.77935400 | -3.74361800 | -0.81149500 |
| N                                               | -5.11260300 | -3.22908100 | -0.49766400 | H | -4.44766500 | -5.20408100 | -1.65428800 |
| N                                               | -5.48612200 | -2.54323000 | 0.49773500  | C | -6.04181900 | -3.82060300 | 1.61026600  |
| N                                               | -5.35276700 | 2.81305300  | -0.49771600 | H | -4.89763600 | -5.35271000 | 2.61641000  |
| N                                               | -4.94557600 | 3.47947900  | 0.49767300  | C | -6.28557500 | -3.17796800 | 0.38409400  |
| <b>[8<sub>t</sub>]CPPD (at B3LYP/6-31G (d))</b> |             |             |             | H | -5.99802700 | -3.25721100 | -1.75510800 |
| C                                               | 6.63523900  | -4.56533400 | 0.18581400  | H | -6.45366800 | -3.38647200 | 2.51566200  |
| C                                               | 6.31665800  | -4.99352400 | -1.11808900 | C | -1.72164100 | 6.77231300  | 0.37026400  |



|   |             |             |             |   |             |             |             |
|---|-------------|-------------|-------------|---|-------------|-------------|-------------|
| C | 6.08430400  | -5.23933700 | 1.29499400  | C | -2.33723900 | 6.46730600  | -0.86798500 |
| C | 5.35778300  | -5.98024900 | -1.29495600 | C | -2.44994400 | 6.61417500  | 1.56225200  |
| H | 6.76099000  | -4.48804900 | -1.96729100 | C | -3.58305600 | 5.86920500  | -0.89219100 |
| C | 5.11659100  | -6.21739700 | 1.11812700  | H | -1.77740600 | 6.61961600  | -1.78351900 |
| H | 6.36842400  | -4.90931200 | 2.28942300  | C | -3.70385400 | 6.01295800  | 1.53785300  |
| C | 4.69473200  | -6.54431600 | -0.18577600 | H | -1.97129200 | 6.87149400  | 2.50165500  |
| H | 5.03339300  | -6.27078900 | -2.28938500 | C | -4.24468700 | 5.56143500  | 0.32131400  |
| H | 4.61994300  | -6.67157300 | 1.96732900  | H | -4.02277500 | 5.54161800  | -1.82713700 |
| H | 4.48805500  | 6.76098300  | -1.96730700 | H | -4.23362400 | 5.78679700  | 2.45762300  |
| C | 4.99352800  | 6.31665300  | -1.11810200 | C | -6.36841600 | 2.88017800  | -0.51842900 |
| C | 4.56533500  | 6.63523700  | 0.18579900  | C | -6.57729800 | 2.20868600  | 0.71059400  |
| C | 5.98025500  | 5.35777900  | -1.29496500 | C | -6.64054500 | 2.21354400  | -1.72589100 |
| C | 5.23933600  | 6.08430500  | 1.29498200  | C | -6.89045700 | 0.86247800  | 0.71832600  |
| C | 6.54432000  | 4.69473100  | -0.18578200 | H | -6.39227600 | 2.74024000  | 1.63688100  |
| H | 6.27079800  | 5.03338800  | -2.28939200 | C | -6.95453800 | 0.85870200  | -1.71814000 |
| C | 6.21739700  | 5.11659300  | 1.11812000  | H | -6.49538500 | 2.74863400  | -2.65883500 |
| H | 4.90930700  | 6.36842700  | 2.28940900  | C | -7.00201700 | 0.15391700  | -0.50265800 |
| H | 6.67157200  | 4.61994700  | 1.96732400  | H | -6.95662600 | 0.31391800  | 1.65082300  |
| H | -1.03176100 | 7.97456000  | 2.28939400  | H | -7.06172300 | 0.30418200  | -2.64486900 |
| C | -0.59748900 | 8.00702600  | 1.29496700  | N | 3.40091100  | -6.16468800 | -0.70810100 |
| C | -1.46364700 | 7.92001700  | 0.18578400  | N | 2.72361300  | -6.40878800 | 0.33288900  |
| C | 0.77838100  | 8.01433600  | 1.11810600  | N | -2.72359900 | -6.40879400 | -0.33288900 |
| C | -0.93559500 | 7.99753000  | -1.11811700 | N | -3.40089700 | -6.16469500 | 0.70810100  |
| C | 1.30785200  | 7.94721200  | -0.18579600 | N | -6.80956000 | -1.87247600 | 0.48082700  |
| H | 1.45071300  | 7.98428900  | 1.96731000  | N | -6.90460000 | -1.24805500 | -0.61609500 |
| C | 0.44015300  | 8.01722000  | -1.29497900 | N | -5.66457000 | 4.09509200  | -0.64888700 |
| H | -1.60720800 | 7.95430600  | -1.96732100 | N | -5.28366600 | 4.61551900  | 0.44035000  |
| H | 0.87497900  | 7.99329300  | -2.28940500 | N | -0.33805800 | 6.98857200  | 0.53504600  |
| C | 1.46364500  | -7.92001700 | 0.18581200  | N | 0.33804300  | 6.98857300  | -0.53504600 |
| C | 0.93560200  | -7.99753400 | -1.11809200 | N | 5.28365500  | 4.61553100  | -0.44035000 |
| C | 0.59748000  | -8.00702300 | 1.29499100  | N | 5.66456100  | 4.09510400  | 0.64888700  |
| C | -0.44014500 | -8.01722500 | -1.29496200 | N | 6.90460300  | -1.24804000 | 0.61609500  |
| H | 1.60722000  | -7.95431200 | -1.96729200 | N | 6.80956400  | -1.87246200 | -0.48082700 |
| C | -0.77838900 | -8.01433300 | 1.11812100  |   |             |             |             |
| H | 1.03174600  | -7.97455400 | 2.28942000  |   |             |             |             |
| C | -1.30785100 | -7.94721300 | -0.18578500 |   |             |             |             |
| H | -0.87496400 | -7.99330100 | -2.28939100 |   |             |             |             |
| H | -1.45072600 | -7.98428400 | 1.96732000  |   |             |             |             |

|   |             |             |             |
|---|-------------|-------------|-------------|
| C | -4.56533600 | -6.63523600 | 0.18578800  |
| C | -5.23934400 | -6.08430200 | 1.29496500  |
| C | -4.99352100 | -6.31665500 | -1.11811700 |
| C | -6.21740500 | -5.11659100 | 1.11809500  |
| H | -4.90932100 | -6.36842200 | 2.28939500  |
| C | -5.98024700 | -5.35778100 | -1.29498800 |
| H | -4.48804200 | -6.76098600 | -1.96731800 |
| C | -6.54432000 | -4.69473200 | -0.18581000 |
| H | -6.67158500 | -4.61994400 | 1.96729500  |
| H | -6.27078400 | -5.03339200 | -2.28941700 |
| H | -4.61995500 | 6.67158000  | 1.96728500  |
| C | -5.11659800 | 6.21740200  | 1.11808100  |
| C | -4.69473200 | 6.54431700  | -0.18582000 |
| C | -6.08431100 | 5.23934200  | 1.29494500  |
| C | -5.35777600 | 5.98024700  | -1.29500300 |
| C | -6.63524000 | 4.56533500  | 0.18576500  |
| H | -6.36843800 | 4.90931900  | 2.28937400  |
| C | -6.31665200 | 4.99352200  | -1.11813900 |
| H | -5.03338100 | 6.27078500  | -2.28943000 |
| H | -6.76097900 | 4.48804400  | -1.96734200 |
| C | -7.94721500 | 1.30785100  | -0.18581800 |
| C | -8.01722100 | 0.44014600  | -1.29499700 |
| C | -8.01434100 | 0.77838700  | 1.11808600  |
| C | -7.99753200 | -0.93560100 | -1.11812900 |
| H | -7.99329100 | 0.87496700  | -2.28942600 |
| C | -8.00703300 | -0.59748200 | 1.29495400  |
| H | -7.98429600 | 1.45072300  | 1.96728600  |
| C | -7.92002200 | -1.46364600 | 0.18577500  |
| H | -7.95430700 | -1.60721800 | -1.96732900 |
| H | -7.97456800 | -1.03174900 | 2.28938300  |
| C | 7.92002000  | 1.46364600  | 0.18581900  |
| C | 7.99753800  | 0.93559800  | -1.11808400 |
| C | 8.00702600  | 0.59748500  | 1.29500000  |
| C | 8.01722900  | -0.44015000 | -1.29494900 |
| H | 7.95431600  | 1.60721400  | -1.96728600 |
| C | 8.01433700  | -0.77838500 | 1.11813500  |
| H | 7.97455600  | 1.03175400  | 2.28942800  |
| C | 7.94721800  | -1.30785200 | -0.18576900 |

|   |             |             |             |
|---|-------------|-------------|-------------|
| H | 7.99330600  | -0.87497200 | -2.28937700 |
| H | 7.98428800  | -1.45071900 | 1.96733700  |
| N | -7.24267100 | -3.50683400 | -0.49788500 |
| N | -7.54774400 | -2.79037400 | 0.49785000  |
| N | -7.60105000 | 2.64163000  | -0.49789500 |
| N | -7.31013300 | 3.36395400  | 0.49783900  |
| N | -3.50683100 | 7.24266700  | -0.49788900 |
| N | -2.79037600 | 7.54773800  | 0.49785100  |
| N | 2.64163200  | 7.60104900  | -0.49786700 |
| N | 3.36395100  | 7.31012800  | 0.49787000  |
| N | 7.24267200  | 3.50683200  | -0.49785100 |
| N | 7.54774000  | 2.79037400  | 0.49788800  |
| N | 7.60105700  | -2.64163200 | -0.49784500 |
| N | 7.31013100  | -3.36395300 | 0.49789000  |
| N | 3.50683200  | -7.24266600 | -0.49784900 |
| N | 2.79037300  | -7.54773700 | 0.49788700  |
| N | -2.64163000 | -7.60105100 | -0.49786500 |
| N | -3.36395400 | -7.31012500 | 0.49786700  |

**Table S3:** Vibrational frequencies cis-cyclic [n]paraphenylenediazenes ([n<sub>c</sub>]CPPDs) obtained using the B3LYP/6-31+G(d,p).

| [2 <sub>c</sub> ]CPPD | [3 <sub>c</sub> ]CPPD | [4 <sub>c</sub> ]CPPD | [5 <sub>c</sub> ]CPPD | [6 <sub>c</sub> ]CPPD <sub>1</sub> | [7 <sub>c</sub> ]CPPD <sub>1</sub> | [8 <sub>c</sub> ]CPPD <sub>1</sub> |
|-----------------------|-----------------------|-----------------------|-----------------------|------------------------------------|------------------------------------|------------------------------------|
| 83.34                 | 17.87                 | 10.11                 | 12.77                 | 13.93                              | 11.73                              | 10.29                              |
| 150.32                | 59.96                 | 52.3                  | 26.15                 | 15.89                              | 13.14                              | 12.32                              |
| 159.3                 | 86.83                 | 55.57                 | 30.39                 | 19.72                              | 16.44                              | 15.33                              |
| 176.86                | 98.35                 | 59.56                 | 38.72                 | 24.84                              | 19.4                               | 17.72                              |
| 276.67                | 99.48                 | 67.52                 | 44.14                 | 29.53                              | 25.39                              | 19.45                              |
| 306.52                | 105.11                | 67.52                 | 52.99                 | 37.63                              | 30.6                               | 20.88                              |
| 308.87                | 113.78                | 68.74                 | 62.36                 | 40.53                              | 32                                 | 29.23                              |
| 341.25                | 182.43                | 119.45                | 63.57                 | 45.41                              | 34.71                              | 33.96                              |
| 385.14                | 206.78                | 135.42                | 73.15                 | 61.53                              | 47.62                              | 35.13                              |
| 441.28                | 208.89                | 135.42                | 83.13                 | 64.83                              | 54.78                              | 37.16                              |
| 450.47                | 268.18                | 158                   | 103.92                | 66.89                              | 57.61                              | 52.29                              |
| 463.7                 | 302.42                | 158                   | 114.31                | 74.8                               | 60.15                              | 54.69                              |
| 503.74                | 327.1                 | 179.12                | 120.87                | 78.29                              | 65.97                              | 57.39                              |
| 575.95                | 343.03                | 218.2                 | 142.42                | 99.2                               | 72.3                               | 62.36                              |
| 595.15                | 346.15                | 222.3                 | 144.63                | 106.23                             | 76.23                              | 65.42                              |
| 605.15                | 399.86                | 235.26                | 170.31                | 108.42                             | 86.75                              | 67.74                              |
| 609.6                 | 406.9                 | 269.69                | 179.23                | 118.8                              | 90.07                              | 70.45                              |
| 631.37                | 415.79                | 269.69                | 187.91                | 139.53                             | 106.44                             | 78.98                              |
| 635.63                | 425.99                | 309.17                | 208.56                | 150.59                             | 115.2                              | 81.89                              |
| 635.78                | 450.26                | 309.17                | 211.74                | 155.11                             | 118.92                             | 90.76                              |
| 670.7                 | 452.44                | 339.71                | 242.67                | 181.57                             | 133.76                             | 94.8                               |
| 701.96                | 481.13                | 372.75                | 257.03                | 186.42                             | 138.66                             | 109.11                             |
| 706.73                | 490.05                | 398.49                | 265.01                | 195.89                             | 140.41                             | 120.77                             |
| 773.85                | 567.02                | 406.24                | 288.46                | 205.41                             | 165.69                             | 126.14                             |
| 791.82                | 597                   | 410.89                | 295.73                | 222.64                             | 172.12                             | 129.13                             |
| 800.51                | 604.63                | 410.89                | 333.03                | 228.55                             | 178.1                              | 142.98                             |
| 802.97                | 610.76                | 415.63                | 336.01                | 246.89                             | 186.13                             | 149.08                             |
| 840.97                | 614.03                | 418.89                | 350.95                | 261.1                              | 210.47                             | 155.29                             |
| 859.83                | 639.48                | 430.18                | 354.84                | 264.84                             | 212.99                             | 171.18                             |
| 937.68                | 642.13                | 430.18                | 392.31                | 299.67                             | 220.33                             | 180.19                             |
| 942.12                | 656.97                | 495.59                | 397.86                | 319.75                             | 232.74                             | 182.94                             |
| 955.73                | 658.66                | 513.16                | 407.41                | 320.75                             | 242.52                             | 191.27                             |
| 957.3                 | 673.99                | 513.16                | 411.77                | 341.43                             | 265.19                             | 211.39                             |
| 966.43                | 686.62                | 529.76                | 414.12                | 351.18                             | 273.38                             | 215.66                             |
| 1023.62               | 705.67                | 566.37                | 417.48                | 358.98                             | 277.25                             | 219.6                              |
| 1025.31               | 715.62                | 592.09                | 423.44                | 359.08                             | 296.88                             | 236.82                             |
| 1113.88               | 776.89                | 592.09                | 430.53                | 397.55                             | 307.69                             | 238.92                             |
| 1116.5                | 777.09                | 616.13                | 442.88                | 404.29                             | 315.38                             | 257.81                             |
| 1132.13               | 807.87                | 619.6                 | 455.84                | 408.14                             | 327.1                              | 265.01                             |
| 1132.32               | 819.02                | 634.3                 | 485.01                | 408.9                              | 333.38                             | 279.4                              |
| 1151.94               | 822.08                | 642.61                | 490.5                 | 413.16                             | 339.63                             | 283.93                             |

|         |         |         |        |        |        |        |
|---------|---------|---------|--------|--------|--------|--------|
| 1152.19 | 829.24  | 642.61  | 504.93 | 414.34 | 356.22 | 294.27 |
| 1186.46 | 830.95  | 661.26  | 532.14 | 416.36 | 363.79 | 304.23 |
| 1191.86 | 839.84  | 661.26  | 534.1  | 417.38 | 392.17 | 312.7  |
| 1303.14 | 865.4   | 673.78  | 565.43 | 426.78 | 401.65 | 320.46 |
| 1303.28 | 868.75  | 690.21  | 585.83 | 430.16 | 409.72 | 331.31 |
| 1305.65 | 920.56  | 703.37  | 591.16 | 453.39 | 411.16 | 333.8  |
| 1315.46 | 920.6   | 711.73  | 608.24 | 455.08 | 412.14 | 339.3  |
| 1394.16 | 955.85  | 711.73  | 615.97 | 473.99 | 414.89 | 358.77 |
| 1419.9  | 961.52  | 736.1   | 623.16 | 484.15 | 416.26 | 363.57 |
| 1487.5  | 961.57  | 752.35  | 626.7  | 503.84 | 417.7  | 393.32 |
| 1497.73 | 966.89  | 798.43  | 635.44 | 523.24 | 422.19 | 401.74 |
| 1523.98 | 972.21  | 798.43  | 638.97 | 528.82 | 425.27 | 403.85 |
| 1533.34 | 972.58  | 811.29  | 646.33 | 538.21 | 432.78 | 408.62 |
| 1573.6  | 1030.11 | 833.19  | 658.23 | 581.06 | 434.55 | 412.44 |
| 1599.06 | 1031.19 | 833.19  | 661.88 | 585.4  | 454.13 | 413.23 |
| 1607.46 | 1031.38 | 833.68  | 673.38 | 596.71 | 460.89 | 415.61 |
| 1616.67 | 1128.36 | 837.23  | 676.07 | 606.43 | 480.97 | 416.83 |
| 3192.32 | 1128.88 | 837.77  | 688.74 | 608.17 | 484.21 | 418.45 |
| 3194.24 | 1129.94 | 837.77  | 698.03 | 618.56 | 506.43 | 419.52 |
| 3194.74 | 1149.77 | 840.91  | 708.15 | 623.12 | 511.61 | 425.06 |
| 3196.94 | 1156.01 | 856.18  | 716.02 | 626.82 | 518.58 | 426.4  |
| 3206.74 | 1156.84 | 868.86  | 726.94 | 630.11 | 530.94 | 438.82 |
| 3207.52 | 1178.36 | 888.77  | 751.71 | 635.76 | 539.05 | 440.82 |
| 3209.44 | 1179    | 888.77  | 752.23 | 642.56 | 574.19 | 445.82 |
| 3210.51 | 1183.02 | 896.15  | 782.3  | 644.19 | 581.6  | 468.96 |
|         | 1198.88 | 964.98  | 796.2  | 648.4  | 590.54 | 487.87 |
|         | 1202.59 | 966.38  | 802.04 | 661.07 | 598.93 | 492.51 |
|         | 1206.52 | 966.7   | 810.75 | 666.35 | 611.22 | 502.95 |
|         | 1312.06 | 966.7   | 826.42 | 669.56 | 613.19 | 508.99 |
|         | 1318.46 | 980.99  | 831.08 | 676.06 | 621.19 | 517.97 |
|         | 1320.62 | 981.66  | 834.31 | 688.96 | 626.34 | 525.17 |
|         | 1326.45 | 981.66  | 835.6  | 694.82 | 628.23 | 529.69 |
|         | 1330.4  | 982.18  | 837.89 | 700.68 | 630.07 | 535.76 |
|         | 1335.28 | 1025.55 | 839.19 | 708.04 | 633.78 | 570.49 |
|         | 1429.23 | 1025.78 | 839.9  | 721.62 | 634.82 | 580.81 |
|         | 1436.59 | 1025.81 | 841.19 | 733.13 | 648.29 | 584.75 |
|         | 1439.11 | 1025.81 | 842.56 | 748.22 | 649.02 | 597.49 |
|         | 1514.54 | 1126.24 | 850.64 | 759.63 | 656.93 | 598.76 |
|         | 1514.66 | 1127.79 | 869.72 | 770.39 | 658.95 | 612.93 |
|         | 1514.69 | 1131.68 | 879.7  | 792.41 | 666.08 | 614.39 |
|         | 1593.24 | 1131.68 | 883.4  | 795.03 | 671.96 | 619.95 |
|         | 1599.44 | 1136.04 | 897.96 | 808.51 | 676.77 | 625.67 |
|         | 1600.8  | 1138    | 902.94 | 813.29 | 681.9  | 626.36 |
|         | 1601.75 | 1138    | 966.38 | 823.15 | 687.91 | 630.29 |

|  |         |         |         |         |        |        |
|--|---------|---------|---------|---------|--------|--------|
|  | 1608.37 | 1163.17 | 968.15  | 826.6   | 700.21 | 636.47 |
|  | 1616.22 | 1163.84 | 968.32  | 831.82  | 705.16 | 639.5  |
|  | 1638.67 | 1183.57 | 970.47  | 833.17  | 713.15 | 643.11 |
|  | 1638.91 | 1183.57 | 976.81  | 835.13  | 724.91 | 644.2  |
|  | 1645.38 | 1192.52 | 980.78  | 836.67  | 728.02 | 647.41 |
|  | 3194.22 | 1208.83 | 980.88  | 837.58  | 746.44 | 658.06 |
|  | 3194.47 | 1208.83 | 984.58  | 838.38  | 752.22 | 659.39 |
|  | 3196.46 | 1209.15 | 984.59  | 839.77  | 770.91 | 661.88 |
|  | 3201.76 | 1209.46 | 985.94  | 842.85  | 775.24 | 667.54 |
|  | 3204.29 | 1322.67 | 1024.84 | 846.69  | 790.28 | 677.44 |
|  | 3208.62 | 1324.15 | 1025.37 | 857.3   | 793.05 | 679.83 |
|  | 3209.03 | 1324.15 | 1025.49 | 870.12  | 798.17 | 682.62 |
|  | 3210.26 | 1326.21 | 1025.68 | 874.75  | 809.68 | 686.27 |
|  | 3213.73 | 1328.33 | 1025.69 | 897.52  | 816.12 | 701.76 |
|  | 3216.84 | 1336.76 | 1112.58 | 898.3   | 825.8  | 703.68 |
|  | 3224.91 | 1336.76 | 1128.52 | 908.32  | 825.94 | 712.02 |
|  | 3227.71 | 1345.36 | 1130.12 | 908.93  | 836.98 | 714.78 |
|  |         | 1438.78 | 1132.89 | 964.07  | 837.96 | 725.31 |
|  |         | 1442.46 | 1134.26 | 964.42  | 839.63 | 738.15 |
|  |         | 1442.46 | 1134.38 | 966.03  | 840.82 | 744.16 |
|  |         | 1447.82 | 1137.56 | 966.06  | 841.76 | 755.85 |
|  |         | 1509.43 | 1138.3  | 969.93  | 841.87 | 769.87 |
|  |         | 1511.61 | 1151.47 | 971.55  | 843.22 | 775.55 |
|  |         | 1511.62 | 1154.58 | 978.24  | 843.74 | 782.04 |
|  |         | 1513.26 | 1170.8  | 978.27  | 847.53 | 793.52 |
|  |         | 1583.64 | 1171.83 | 980.39  | 849.15 | 796.03 |
|  |         | 1591.85 | 1183.67 | 980.61  | 856.87 | 807.23 |
|  |         | 1593.59 | 1189.13 | 981.75  | 863.99 | 811.38 |
|  |         | 1593.59 | 1193.46 | 982.14  | 875.16 | 816.1  |
|  |         | 1598.64 | 1206.73 | 1026.76 | 880.37 | 823.52 |
|  |         | 1598.64 | 1208.63 | 1026.83 | 885.7  | 825.37 |
|  |         | 1603.81 | 1209.42 | 1027.38 | 889.93 | 833.82 |
|  |         | 1614.45 | 1209.57 | 1027.61 | 894.86 | 836.45 |
|  |         | 1633.94 | 1215.61 | 1029.24 | 901.57 | 836.69 |
|  |         | 1647.6  | 1321.32 | 1029.49 | 907.33 | 837.41 |
|  |         | 1647.6  | 1322.98 | 1125.62 | 962.17 | 839.99 |
|  |         | 1655.91 | 1324.11 | 1126.28 | 963.39 | 841.18 |
|  |         | 3199.78 | 1324.61 | 1130.16 | 965.78 | 843.22 |
|  |         | 3199.83 | 1325.57 | 1130.85 | 966.81 | 843.89 |
|  |         | 3199.83 | 1328.23 | 1132.06 | 967.48 | 845.01 |
|  |         | 3199.87 | 1328.38 | 1132.25 | 968.73 | 850.5  |
|  |         | 3204.41 | 1335.52 | 1135.43 | 969.43 | 853.28 |
|  |         | 3204.74 | 1338.83 | 1135.76 | 971.84 | 854.88 |
|  |         | 3204.77 | 1348.88 | 1143.01 | 972.34 | 857.59 |

|  |  |         |         |         |         |         |
|--|--|---------|---------|---------|---------|---------|
|  |  | 3204.77 | 1439.73 | 1144.89 | 972.66  | 867.68  |
|  |  | 3213.78 | 1439.81 | 1156.84 | 974.31  | 871.2   |
|  |  | 3213.8  | 1443.75 | 1160.46 | 977.37  | 881.23  |
|  |  | 3213.8  | 1444.67 | 1171.77 | 981.18  | 886.82  |
|  |  | 3213.86 | 1448.6  | 1177.08 | 981.33  | 890.84  |
|  |  | 3218.17 | 1506.99 | 1180.49 | 1028.04 | 894.91  |
|  |  | 3218.17 | 1511.04 | 1185.81 | 1028.7  | 899.64  |
|  |  | 3218.3  | 1513.05 | 1189.39 | 1029.35 | 903.8   |
|  |  | 3218.44 | 1513.99 | 1191.31 | 1029.89 | 908.68  |
|  |  |         | 1516.38 | 1205.29 | 1030.17 | 956.67  |
|  |  |         | 1575.31 | 1205.72 | 1030.62 | 964.12  |
|  |  |         | 1581.06 | 1206.65 | 1031.02 | 965.41  |
|  |  |         | 1584.98 | 1207.48 | 1130.23 | 966     |
|  |  |         | 1590.54 | 1207.85 | 1132.62 | 967.2   |
|  |  |         | 1590.64 | 1210.02 | 1134.32 | 970.93  |
|  |  |         | 1598.54 | 1319.88 | 1135.69 | 972.32  |
|  |  |         | 1599    | 1321.6  | 1137.24 | 973.07  |
|  |  |         | 1606.36 | 1322.23 | 1137.64 | 974.27  |
|  |  |         | 1610.54 | 1322.56 | 1139.55 | 975.45  |
|  |  |         | 1611.55 | 1323.22 | 1140.84 | 976.2   |
|  |  |         | 1634.16 | 1323.38 | 1141.79 | 976.51  |
|  |  |         | 1642.04 | 1327.87 | 1144.95 | 976.54  |
|  |  |         | 1648.35 | 1329.04 | 1148.15 | 978.99  |
|  |  |         | 1650.93 | 1331.38 | 1151.7  | 980.74  |
|  |  |         | 1654.72 | 1335.24 | 1159.98 | 986.12  |
|  |  |         | 3197    | 1338.87 | 1162.92 | 1028.55 |
|  |  |         | 3197.24 | 1340.97 | 1174.19 | 1028.72 |
|  |  |         | 3199.26 | 1435.86 | 1176.06 | 1029.08 |
|  |  |         | 3199.3  | 1438.27 | 1185.2  | 1029.15 |
|  |  |         | 3202.53 | 1439.18 | 1187.86 | 1029.55 |
|  |  |         | 3202.56 | 1442.39 | 1193.26 | 1029.73 |
|  |  |         | 3202.63 | 1444.3  | 1195.81 | 1030.01 |
|  |  |         | 3204.55 | 1445.09 | 1197.68 | 1030.89 |
|  |  |         | 3204.57 | 1510.32 | 1212.07 | 1127.85 |
|  |  |         | 3214.83 | 1510.42 | 1214.79 | 1133.04 |
|  |  |         | 3214.84 | 1513.76 | 1215.3  | 1134.3  |
|  |  |         | 3215.51 | 1513.96 | 1216.3  | 1135.89 |
|  |  |         | 3217.74 | 1515.14 | 1217.29 | 1136.87 |
|  |  |         | 3217.98 | 1515.3  | 1220.07 | 1137.09 |
|  |  |         | 3217.99 | 1580.45 | 1221.61 | 1138.49 |
|  |  |         | 3219.31 | 1580.77 | 1324.79 | 1139.63 |
|  |  |         | 3223.89 | 1588.1  | 1330    | 1140.93 |
|  |  |         | 3228.47 | 1588.17 | 1330.08 | 1141.54 |
|  |  |         | 3228.48 | 1594.35 | 1331.17 | 1142.95 |

|  |  |  |         |         |         |         |
|--|--|--|---------|---------|---------|---------|
|  |  |  | 3237.07 | 1595.14 | 1331.65 | 1144.47 |
|  |  |  |         | 1601.5  | 1332.45 | 1149.22 |
|  |  |  |         | 1602.71 | 1333.54 | 1156.55 |
|  |  |  |         | 1607.89 | 1335.77 | 1160.44 |
|  |  |  |         | 1608.31 | 1336.5  | 1168.1  |
|  |  |  |         | 1615.09 | 1337.57 | 1170.05 |
|  |  |  |         | 1616.24 | 1340.43 | 1179.58 |
|  |  |  |         | 1635.46 | 1344.13 | 1181.35 |
|  |  |  |         | 1637.88 | 1349.27 | 1187.91 |
|  |  |  |         | 1643.01 | 1350.54 | 1188.82 |
|  |  |  |         | 1646.27 | 1447.2  | 1193.4  |
|  |  |  |         | 1649.38 | 1449.03 | 1194.77 |
|  |  |  |         | 1651.33 | 1450.41 | 1196.49 |
|  |  |  |         | 3194.7  | 1452.76 | 1213.7  |
|  |  |  |         | 3194.95 | 1454.27 | 1214.83 |
|  |  |  |         | 3198.57 | 1456.64 | 1216.01 |
|  |  |  |         | 3198.58 | 1457.47 | 1216.87 |
|  |  |  |         | 3199.64 | 1519.87 | 1217.16 |
|  |  |  |         | 3199.65 | 1520.5  | 1217.46 |
|  |  |  |         | 3202.36 | 1522.55 | 1217.67 |
|  |  |  |         | 3202.39 | 1522.85 | 1220.8  |
|  |  |  |         | 3202.84 | 1524.91 | 1327.65 |
|  |  |  |         | 3202.84 | 1525.68 | 1329.71 |
|  |  |  |         | 3207.25 | 1526.57 | 1330.54 |
|  |  |  |         | 3207.25 | 1583.04 | 1331.13 |
|  |  |  |         | 3212.41 | 1585.19 | 1331.69 |
|  |  |  |         | 3212.42 | 1589.06 | 1332.06 |
|  |  |  |         | 3213.62 | 1591.59 | 1333.5  |
|  |  |  |         | 3213.63 | 1594.81 | 1333.81 |
|  |  |  |         | 3216.67 | 1599.95 | 1335.61 |
|  |  |  |         | 3216.68 | 1600.83 | 1336.43 |
|  |  |  |         | 3216.92 | 1604.38 | 1336.65 |
|  |  |  |         | 3216.93 | 1605.47 | 1339.36 |
|  |  |  |         | 3222.64 | 1607.29 | 1342.32 |
|  |  |  |         | 3222.64 | 1609.69 | 1345.5  |
|  |  |  |         | 3241.67 | 1612.13 | 1347.12 |
|  |  |  |         | 3242.5  | 1613.02 | 1350.57 |
|  |  |  |         |         | 1616.64 | 1447.15 |
|  |  |  |         |         | 1645.75 | 1448.76 |
|  |  |  |         |         | 1647.27 | 1450.3  |
|  |  |  |         |         | 1651.49 | 1452.52 |
|  |  |  |         |         | 1652.76 | 1452.95 |
|  |  |  |         |         | 1656.33 | 1454.84 |
|  |  |  |         |         | 1658.12 | 1455.98 |



|  |  |  |  |  |         |         |
|--|--|--|--|--|---------|---------|
|  |  |  |  |  | 1663.53 | 1457.72 |
|  |  |  |  |  | 3198.35 | 1520.36 |
|  |  |  |  |  | 3201.73 | 1521.1  |
|  |  |  |  |  | 3205.3  | 1521.75 |
|  |  |  |  |  | 3206.2  | 1522.74 |
|  |  |  |  |  | 3206.49 | 1523.27 |
|  |  |  |  |  | 3207.71 | 1525.06 |
|  |  |  |  |  | 3208.01 | 1525.34 |
|  |  |  |  |  | 3208.15 | 1525.97 |
|  |  |  |  |  | 3208.77 | 1581.28 |
|  |  |  |  |  | 3208.94 | 1582.92 |
|  |  |  |  |  | 3210.76 | 1586.09 |
|  |  |  |  |  | 3212.14 | 1591.81 |
|  |  |  |  |  | 3215.44 | 1594.72 |
|  |  |  |  |  | 3218.9  | 1600.13 |
|  |  |  |  |  | 3220.27 | 1601.04 |
|  |  |  |  |  | 3221.09 | 1601.78 |
|  |  |  |  |  | 3221.94 | 1603.19 |
|  |  |  |  |  | 3222.02 | 1604.91 |
|  |  |  |  |  | 3222.24 | 1606.14 |
|  |  |  |  |  | 3222.57 | 1608.82 |
|  |  |  |  |  | 3224.98 | 1611.23 |
|  |  |  |  |  | 3225.63 | 1612.69 |
|  |  |  |  |  | 3225.83 | 1614.21 |
|  |  |  |  |  | 3227.74 | 1616.18 |
|  |  |  |  |  | 3229.32 | 1643.52 |
|  |  |  |  |  | 3239.23 | 1647.09 |
|  |  |  |  |  | 3241.82 | 1648.35 |
|  |  |  |  |  | 3267.09 | 1652.1  |
|  |  |  |  |  |         | 1653.67 |
|  |  |  |  |  |         | 1656.97 |
|  |  |  |  |  |         | 1658.78 |
|  |  |  |  |  |         | 1660.12 |
|  |  |  |  |  |         | 3202.81 |
|  |  |  |  |  |         | 3203.03 |
|  |  |  |  |  |         | 3205.19 |
|  |  |  |  |  |         | 3205.22 |
|  |  |  |  |  |         | 3205.22 |
|  |  |  |  |  |         | 3206.31 |
|  |  |  |  |  |         | 3206.84 |
|  |  |  |  |  |         | 3208.2  |
|  |  |  |  |  |         | 3208.74 |
|  |  |  |  |  |         | 3209.31 |
|  |  |  |  |  |         | 3210.14 |

|  |  |  |  |  |  |         |
|--|--|--|--|--|--|---------|
|  |  |  |  |  |  | 3210.95 |
|  |  |  |  |  |  | 3211.62 |
|  |  |  |  |  |  | 3212.63 |
|  |  |  |  |  |  | 3215.4  |
|  |  |  |  |  |  | 3217.7  |
|  |  |  |  |  |  | 3218.89 |
|  |  |  |  |  |  | 3219.41 |
|  |  |  |  |  |  | 3219.76 |
|  |  |  |  |  |  | 3221.53 |
|  |  |  |  |  |  | 3222.32 |
|  |  |  |  |  |  | 3222.48 |
|  |  |  |  |  |  | 3222.62 |
|  |  |  |  |  |  | 3225.95 |
|  |  |  |  |  |  | 3231.65 |
|  |  |  |  |  |  | 3232.44 |
|  |  |  |  |  |  | 3233.42 |
|  |  |  |  |  |  | 3234.46 |
|  |  |  |  |  |  | 3234.49 |
|  |  |  |  |  |  | 3237.57 |
|  |  |  |  |  |  | 3240.89 |
|  |  |  |  |  |  | 3244.82 |

| <b>[6<sub>c</sub>]CPPD<sub>2</sub></b> | <b>[7<sub>c</sub>]CPPD<sub>2</sub></b> | <b>[8<sub>c</sub>]CPPD<sub>2</sub></b> |
|----------------------------------------|----------------------------------------|----------------------------------------|
| 15.3                                   | 8.1                                    | 21.3                                   |
| 16.3                                   | 13.0                                   | 21.4                                   |
| 23.0                                   | 15.2                                   | 26.0                                   |
| 23.7                                   | 19.6                                   | 26.4                                   |
| 26.2                                   | 23.7                                   | 31.4                                   |
| 34.3                                   | 24.9                                   | 33.4                                   |
| 36.6                                   | 29.2                                   | 33.4                                   |
| 49.6                                   | 33.2                                   | 35.4                                   |
| 51.4                                   | 37.9                                   | 39.1                                   |
| 63.1                                   | 51.4                                   | 40.0                                   |
| 73.2                                   | 55.1                                   | 48.9                                   |
| 73.5                                   | 60.9                                   | 55.2                                   |
| 90.2                                   | 65.3                                   | 55.2                                   |
| 97.5                                   | 71.2                                   | 66.3                                   |
| 98.0                                   | 76.2                                   | 70.0                                   |
| 142.1                                  | 84.3                                   | 75.6                                   |
| 144.7                                  | 89.3                                   | 75.6                                   |
| 145.0                                  | 100.3                                  | 84.5                                   |
| 154.0                                  | 114.6                                  | 96.5                                   |
| 154.1                                  | 123.6                                  | 96.6                                   |
| 190.8                                  | 128.5                                  | 97.8                                   |
| 192.4                                  | 142.7                                  | 105.0                                  |
| 192.6                                  | 152.8                                  | 128.7                                  |
| 199.0                                  | 156.9                                  | 134.3                                  |

|       |       |       |
|-------|-------|-------|
| 219.1 | 170.5 | 134.3 |
| 252.2 | 186.0 | 147.6 |
| 252.6 | 190.3 | 154.4 |
| 256.6 | 203.8 | 168.4 |
| 281.1 | 212.7 | 174.4 |
| 281.3 | 220.5 | 174.4 |
| 313.4 | 240.9 | 193.3 |
| 319.9 | 250.1 | 193.3 |
| 320.0 | 256.4 | 202.7 |
| 328.7 | 275.6 | 210.2 |
| 329.0 | 284.2 | 233.5 |
| 368.5 | 296.3 | 239.0 |
| 399.9 | 305.3 | 244.3 |
| 400.1 | 312.1 | 244.4 |
| 402.8 | 325.1 | 276.0 |
| 411.6 | 327.5 | 280.0 |
| 412.8 | 336.6 | 280.0 |
| 413.5 | 350.2 | 288.5 |
| 426.3 | 358.3 | 312.3 |
| 426.9 | 396.1 | 315.3 |
| 427.7 | 405.5 | 319.8 |
| 451.5 | 408.8 | 319.8 |
| 454.1 | 411.0 | 340.6 |
| 454.3 | 414.0 | 342.9 |
| 472.8 | 415.1 | 342.9 |
| 496.7 | 417.1 | 370.4 |
| 497.1 | 421.9 | 395.4 |
| 519.6 | 423.5 | 398.0 |
| 519.8 | 424.8 | 410.9 |
| 524.6 | 429.5 | 410.9 |
| 567.8 | 438.6 | 413.6 |
| 568.0 | 448.2 | 415.5 |
| 593.9 | 462.4 | 415.6 |
| 598.7 | 483.4 | 417.1 |
| 616.0 | 486.8 | 421.1 |
| 616.2 | 508.2 | 424.4 |
| 624.2 | 509.4 | 425.9 |
| 626.3 | 518.7 | 425.9 |
| 626.4 | 526.3 | 438.0 |
| 643.9 | 533.0 | 438.0 |
| 644.2 | 574.6 | 445.0 |
| 644.3 | 581.1 | 462.2 |
| 660.6 | 597.0 | 492.8 |
| 665.9 | 598.6 | 506.3 |
| 666.1 | 604.9 | 506.9 |
| 683.4 | 616.2 | 507.0 |
| 683.5 | 620.1 | 523.1 |
| 686.3 | 623.1 | 524.9 |
| 704.6 | 625.4 | 524.9 |
| 704.7 | 631.7 | 528.6 |
| 712.9 | 632.5 | 580.5 |
| 728.8 | 635.7 | 582.8 |

|        |       |       |
|--------|-------|-------|
| 745.7  | 645.5 | 582.8 |
| 746.0  | 650.4 | 591.6 |
| 778.0  | 658.3 | 603.1 |
| 778.3  | 660.5 | 613.7 |
| 786.2  | 666.8 | 613.7 |
| 799.6  | 670.4 | 618.6 |
| 799.7  | 679.0 | 621.0 |
| 814.6  | 682.2 | 626.5 |
| 822.8  | 683.5 | 626.5 |
| 832.3  | 701.0 | 639.9 |
| 832.8  | 705.0 | 640.5 |
| 842.3  | 717.5 | 645.3 |
| 844.0  | 722.3 | 645.3 |
| 844.2  | 739.9 | 646.5 |
| 844.7  | 745.1 | 658.7 |
| 845.5  | 753.1 | 664.1 |
| 845.8  | 772.3 | 667.0 |
| 852.9  | 778.6 | 667.0 |
| 856.8  | 788.4 | 674.4 |
| 857.0  | 793.5 | 674.5 |
| 876.6  | 794.5 | 676.8 |
| 876.8  | 808.6 | 684.9 |
| 883.0  | 813.1 | 705.1 |
| 892.4  | 822.5 | 712.7 |
| 898.1  | 826.3 | 712.7 |
| 898.3  | 834.4 | 718.7 |
| 974.3  | 837.9 | 730.1 |
| 975.0  | 841.2 | 741.8 |
| 976.3  | 842.1 | 741.8 |
| 979.3  | 843.0 | 753.3 |
| 979.8  | 843.6 | 777.1 |
| 980.7  | 845.6 | 779.9 |
| 986.8  | 847.3 | 780.2 |
| 987.6  | 848.9 | 780.2 |
| 987.8  | 849.8 | 805.9 |
| 989.5  | 857.2 | 810.4 |
| 990.0  | 863.0 | 810.4 |
| 990.7  | 877.3 | 814.5 |
| 1025.0 | 881.1 | 826.6 |
| 1025.1 | 886.3 | 830.1 |
| 1025.3 | 887.6 | 830.1 |
| 1025.7 | 888.8 | 832.8 |
| 1025.7 | 901.1 | 838.3 |
| 1026.1 | 901.3 | 841.3 |
| 1122.1 | 961.4 | 841.3 |
| 1127.1 | 963.3 | 843.3 |
| 1127.2 | 967.4 | 844.8 |
| 1131.8 | 970.4 | 845.3 |
| 1131.8 | 971.1 | 845.3 |
| 1133.4 | 971.6 | 847.3 |
| 1137.3 | 972.6 | 854.9 |
| 1138.6 | 973.2 | 857.2 |

|        |        |        |
|--------|--------|--------|
| 1138.7 | 974.7  | 857.2  |
| 1146.2 | 975.2  | 859.6  |
| 1146.3 | 976.9  | 880.3  |
| 1161.2 | 982.4  | 885.5  |
| 1161.7 | 984.0  | 885.5  |
| 1176.1 | 990.5  | 889.8  |
| 1176.4 | 1027.1 | 898.2  |
| 1188.6 | 1027.9 | 899.0  |
| 1188.8 | 1028.7 | 899.0  |
| 1193.9 | 1029.1 | 903.5  |
| 1211.6 | 1029.2 | 963.0  |
| 1211.7 | 1029.6 | 966.0  |
| 1211.7 | 1030.3 | 966.0  |
| 1214.0 | 1124.3 | 966.3  |
| 1214.1 | 1129.8 | 967.2  |
| 1214.3 | 1133.9 | 967.8  |
| 1324.7 | 1134.7 | 967.9  |
| 1324.8 | 1136.0 | 970.8  |
| 1325.5 | 1136.4 | 984.5  |
| 1326.0 | 1140.4 | 984.6  |
| 1327.0 | 1140.9 | 984.6  |
| 1327.2 | 1142.3 | 984.7  |
| 1331.5 | 1144.1 | 988.5  |
| 1331.7 | 1145.2 | 988.6  |
| 1338.2 | 1149.3 | 992.9  |
| 1343.1 | 1157.6 | 993.0  |
| 1349.0 | 1161.6 | 1028.7 |
| 1349.1 | 1171.6 | 1028.7 |
| 1445.2 | 1175.9 | 1028.8 |
| 1445.3 | 1185.7 | 1029.1 |
| 1448.9 | 1187.3 | 1029.3 |
| 1448.9 | 1193.0 | 1029.3 |
| 1452.1 | 1195.8 | 1029.5 |
| 1452.1 | 1197.7 | 1029.9 |
| 1510.5 | 1213.3 | 1126.1 |
| 1511.4 | 1215.1 | 1130.9 |
| 1511.7 | 1215.4 | 1130.9 |
| 1514.8 | 1215.8 | 1136.7 |
| 1515.1 | 1221.7 | 1139.1 |
| 1516.7 | 1222.6 | 1139.6 |
| 1566.8 | 1224.9 | 1139.6 |
| 1572.5 | 1324.8 | 1142.0 |
| 1572.6 | 1329.5 | 1145.1 |
| 1589.2 | 1330.5 | 1145.2 |
| 1589.3 | 1331.2 | 1145.4 |
| 1596.1 | 1331.7 | 1148.0 |
| 1596.1 | 1332.2 | 1149.5 |
| 1596.6 | 1332.9 | 1155.8 |
| 1597.7 | 1336.1 | 1155.8 |
| 1601.4 | 1336.6 | 1164.5 |
| 1602.4 | 1338.5 | 1174.5 |
| 1602.5 | 1339.7 | 1180.5 |

|        |        |        |
|--------|--------|--------|
| 1638.9 | 1342.4 | 1180.5 |
| 1643.5 | 1349.5 | 1185.3 |
| 1643.7 | 1351.0 | 1195.7 |
| 1651.4 | 1448.6 | 1197.0 |
| 1651.6 | 1449.2 | 1197.0 |
| 1654.4 | 1451.6 | 1199.9 |
| 3200.4 | 1452.5 | 1219.6 |
| 3200.5 | 1454.3 | 1219.6 |
| 3200.7 | 1456.2 | 1221.0 |
| 3203.8 | 1457.4 | 1221.2 |
| 3203.9 | 1517.8 | 1221.3 |
| 3204.0 | 1520.3 | 1222.4 |
| 3204.1 | 1521.2 | 1222.4 |
| 3204.2 | 1522.4 | 1224.8 |
| 3204.3 | 1524.1 | 1328.9 |
| 3205.9 | 1526.0 | 1329.5 |
| 3205.9 | 1527.0 | 1329.5 |
| 3206.0 | 1580.5 | 1331.5 |
| 3213.8 | 1582.1 | 1334.9 |
| 3213.8 | 1588.1 | 1334.9 |
| 3214.1 | 1591.3 | 1335.9 |
| 3217.7 | 1594.9 | 1336.3 |
| 3217.9 | 1597.7 | 1337.9 |
| 3218.2 | 1599.8 | 1337.9 |
| 3222.4 | 1603.1 | 1339.0 |
| 3222.6 | 1605.0 | 1340.3 |
| 3222.8 | 1606.7 | 1344.4 |
| 3223.3 | 1608.2 | 1346.7 |
| 3223.8 | 1609.7 | 1346.8 |
| 3223.8 | 1611.6 | 1348.9 |
|        | 1614.6 | 1450.3 |
|        | 1645.9 | 1450.3 |
|        | 1647.8 | 1450.4 |
|        | 1651.9 | 1452.4 |
|        | 1654.0 | 1453.8 |
|        | 1658.4 | 1455.5 |
|        | 1658.7 | 1455.5 |
|        | 1662.7 | 1457.2 |
|        | 3200.8 | 1520.0 |
|        | 3200.8 | 1520.0 |
|        | 3205.6 | 1520.3 |
|        | 3206.6 | 1522.5 |
|        | 3207.1 | 1524.6 |
|        | 3208.1 | 1525.7 |
|        | 3208.5 | 1525.7 |
|        | 3209.2 | 1526.8 |
|        | 3210.0 | 1574.0 |
|        | 3210.0 | 1577.3 |
|        | 3212.0 | 1577.3 |
|        | 3213.3 | 1581.5 |
|        | 3220.2 | 1598.1 |
|        | 3220.5 | 1598.8 |

|  |        |        |
|--|--------|--------|
|  | 3221.2 | 1598.9 |
|  | 3221.9 | 1598.9 |
|  | 3222.3 | 1602.2 |
|  | 3223.6 | 1602.2 |
|  | 3223.8 | 1603.2 |
|  | 3224.5 | 1604.4 |
|  | 3224.9 | 1605.1 |
|  | 3226.5 | 1607.6 |
|  | 3226.7 | 1607.7 |
|  | 3227.1 | 1609.7 |
|  | 3239.4 | 1645.5 |
|  | 3244.1 | 1648.3 |
|  | 3266.4 | 1648.3 |
|  | 3273.1 | 1651.0 |
|  |        | 1655.0 |
|  |        | 1657.6 |
|  |        | 1657.6 |
|  |        | 1658.4 |
|  |        | 3209.5 |
|  |        | 3209.5 |
|  |        | 3209.6 |

**Table S4:** Vibrational frequencies trans-cyclic [n]paraphenylenediazenes ([n]CPPDs) obtained using the B3LYP/6-31+G(d,p).

| [2 <sub>t</sub> ]CPPD | [3 <sub>t</sub> ]CPPD | [4 <sub>t</sub> ]CPPD | [5 <sub>t</sub> ]CPPD | [6 <sub>t</sub> ]CPPD | [7 <sub>t</sub> ]CPPD | [8 <sub>t</sub> ]CPPD |
|-----------------------|-----------------------|-----------------------|-----------------------|-----------------------|-----------------------|-----------------------|
| 123.4                 | 52.2                  | 23.97                 | 27.51                 | 19.53                 | 14.66                 | 12.49                 |
| 159.9                 | 62.3                  | 37.45                 | 27.54                 | 19.55                 | 14.81                 | 12.51                 |
| 181.0                 | 87.7                  | 56.63                 | 33.66                 | 25.09                 | 19.97                 | 19.11                 |
| 216.6                 | 99.7                  | 71.1                  | 33.66                 | 25.11                 | 20.1                  | 19.13                 |
| 250.0                 | 114.3                 | 85.2                  | 73.3                  | 39.39                 | 37.63                 | 31.35                 |
| 282.5                 | 139.0                 | 85.2                  | 73.36                 | 44.37                 | 37.7                  | 31.35                 |
| 358.1                 | 198.4                 | 119.73                | 85.38                 | 61.27                 | 40.11                 | 39.74                 |
| 401.1                 | 216.3                 | 119.73                | 85.39                 | 77.98                 | 40.21                 | 39.74                 |
| 401.8                 | 230.1                 | 122.22                | 89.17                 | 78                    | 67.57                 | 47.05                 |
| 408.1                 | 259.9                 | 144.92                | 89.18                 | 78.95                 | 68.16                 | 49.13                 |
| 425.9                 | 269.0                 | 195.71                | 92.34                 | 79.04                 | 68.48                 | 63.86                 |
| 486.6                 | 282.3                 | 207.57                | 120.84                | 79.08                 | 70.31                 | 65.2                  |
| 534.0                 | 328.4                 | 218.51                | 120.85                | 88.96                 | 71.12                 | 65.2                  |
| 543.9                 | 345.5                 | 228.11                | 145.93                | 92.38                 | 75.2                  | 69.26                 |
| 557.0                 | 369.6                 | 228.11                | 168.08                | 92.42                 | 76.49                 | 70.44                 |
| 557.1                 | 390.3                 | 249.25                | 195.56                | 121.89                | 80.11                 | 70.46                 |
| 575.6                 | 417.5                 | 249.25                | 195.57                | 121.91                | 82.22                 | 81.45                 |
| 596.8                 | 422.1                 | 321.57                | 225.15                | 135.51                | 109.42                | 81.45                 |
| 624.2                 | 427.5                 | 326.66                | 225.15                | 144.64                | 109.74                | 87.44                 |
| 642.1                 | 438.9                 | 330.34                | 228.87                | 178.51                | 118.35                | 87.44                 |
| 708.6                 | 461.5                 | 341.44                | 228.89                | 197.95                | 133.19                | 95.56                 |
| 712.7                 | 494.9                 | 341.44                | 237.66                | 197.97                | 139.96                | 106.83                |
| 745.5                 | 495.7                 | 395.74                | 237.67                | 203.79                | 145.16                | 106.85                |
| 751.8                 | 499.4                 | 395.74                | 239.63                | 203.79                | 156.85                | 110.04                |
| 773.6                 | 563.6                 | 421.95                | 316.83                | 219.61                | 163.44                | 121.27                |
| 784.0                 | 579.4                 | 424.96                | 316.83                | 231.38                | 205.6                 | 121.27                |
| 786.6                 | 583.4                 | 428.55                | 336.28                | 231.39                | 209.99                | 127.44                |
| 797.6                 | 586.4                 | 434.38                | 358.88                | 231.81                | 224.26                | 153.84                |
| 822.6                 | 598.8                 | 434.38                | 382.44                | 231.82                | 230.6                 | 153.84                |
| 855.2                 | 607.1                 | 466.22                | 382.45                | 245.5                 | 232.11                | 169.5                 |
| 934.1                 | 631.5                 | 481.01                | 390.7                 | 315.24                | 237.77                | 188.92                |
| 951.3                 | 642.0                 | 497.29                | 390.72                | 315.24                | 247.09                | 188.92                |
| 952.8                 | 645.3                 | 497.29                | 417.34                | 339.41                | 248.2                 | 200.53                |
| 957.7                 | 723.7                 | 513.87                | 417.34                | 342.08                | 254.13                | 212.29                |
| 963.8                 | 733.3                 | 529.86                | 417.56                | 342.08                | 254.29                | 212.29                |
| 965.2                 | 747.1                 | 533.29                | 417.57                | 356.65                | 258.03                | 214.78                |
| 978.9                 | 763.7                 | 569.05                | 424.33                | 377.24                | 279.39                | 214.78                |
| 979.0                 | 770.5                 | 569.05                | 426.81                | 377.26                | 281.59                | 220.69                |
| 1090.9                | 780.9                 | 586.74                | 426.82                | 416.25                | 304.12                | 220.69                |
| 1092.3                | 786.6                 | 592.13                | 484.75                | 416.26                | 317.41                | 239.48                |
| 1162.4                | 793.3                 | 607.37                | 502.85                | 418.93                | 335.9                 | 239.48                |



|        |        |         |        |        |        |        |
|--------|--------|---------|--------|--------|--------|--------|
| 1163.9 | 798.9  | 607.37  | 502.85 | 419.01 | 347.71 | 251.83 |
| 1241.0 | 804.8  | 614.2   | 517.79 | 419.03 | 361.27 | 298.85 |
| 1245.8 | 806.5  | 614.2   | 517.79 | 419.93 | 364.54 | 298.86 |
| 1279.0 | 818.3  | 630.06  | 549.36 | 419.94 | 388.59 | 322.96 |
| 1287.9 | 843.6  | 675.69  | 549.37 | 424.35 | 389.56 | 322.96 |
| 1360.7 | 857.3  | 737.06  | 558.14 | 426.97 | 393.45 | 341.93 |
| 1375.6 | 863.6  | 739.61  | 558.15 | 445.54 | 400.43 | 355.93 |
| 1395.9 | 961.8  | 740.15  | 558.98 | 472.78 | 415.63 | 356.83 |
| 1401.4 | 961.9  | 740.15  | 558.99 | 485.39 | 419.27 | 356.83 |
| 1540.6 | 962.3  | 773.28  | 570.69 | 512.9  | 421.83 | 370.43 |
| 1541.7 | 981.5  | 782.61  | 625.98 | 512.9  | 430.88 | 370.43 |
| 1580.7 | 986.6  | 782.61  | 633.58 | 525.9  | 431.67 | 400.85 |
| 1583.1 | 988.1  | 787.1   | 633.58 | 525.91 | 435.75 | 400.86 |
| 1584.6 | 989.4  | 805.78  | 648.77 | 530.06 | 437.88 | 418.96 |
| 1586.6 | 1004.2 | 807.98  | 648.78 | 546.47 | 453.67 | 423.39 |
| 1682.4 | 1004.7 | 807.98  | 650.83 | 546.47 | 456.58 | 423.39 |
| 1684.3 | 1037.7 | 813.08  | 650.83 | 556.09 | 481.45 | 423.48 |
| 3204.2 | 1043.2 | 833.45  | 707.29 | 567.38 | 490.61 | 423.49 |
| 3204.2 | 1052.6 | 835.21  | 715.68 | 567.39 | 496.18 | 424.03 |
| 3204.9 | 1109.0 | 835.21  | 730.5  | 583.01 | 511.2  | 424.03 |
| 3205.0 | 1116.4 | 842.57  | 730.51 | 583.01 | 511.74 | 425.05 |
| 3220.2 | 1117.3 | 855.19  | 751.03 | 583.33 | 530.6  | 425.17 |
| 3220.4 | 1170.2 | 866.96  | 751.06 | 629.9  | 531.73 | 434.56 |
| 3221.6 | 1178.1 | 866.96  | 799.67 | 635.03 | 539.35 | 434.56 |
| 3221.7 | 1180.0 | 876     | 816.24 | 635.04 | 539.6  | 452.89 |
|        | 1269.3 | 965.36  | 816.26 | 647.42 | 544.26 | 477.26 |
|        | 1279.7 | 966.43  | 821.07 | 647.42 | 545.06 | 487.28 |
|        | 1279.9 | 966.43  | 821.07 | 654.73 | 551    | 505.46 |
|        | 1314.4 | 967.29  | 824.19 | 665.73 | 552.02 | 505.46 |
|        | 1329.2 | 990.58  | 830.04 | 665.73 | 568.21 | 520.34 |
|        | 1329.2 | 991.29  | 830.04 | 709.17 | 569.39 | 520.34 |
|        | 1382.4 | 991.29  | 861.54 | 718.15 | 578.11 | 525.71 |
|        | 1394.0 | 992.78  | 861.54 | 727.19 | 607.53 | 532.5  |
|        | 1399.0 | 994.56  | 863.26 | 727.2  | 608.9  | 532.5  |
|        | 1428.5 | 995.4   | 863.26 | 747.09 | 630.96 | 552.93 |
|        | 1437.9 | 995.4   | 872.86 | 747.11 | 635.08 | 552.93 |
|        | 1439.5 | 995.84  | 872.86 | 756.76 | 635.19 | 557.34 |
|        | 1534.3 | 1074.51 | 879.24 | 794.88 | 644.25 | 557.35 |
|        | 1539.4 | 1075.55 | 915.19 | 821.86 | 644.68 | 558.13 |
|        | 1563.9 | 1075.55 | 915.19 | 821.86 | 652.34 | 558.13 |
|        | 1595.4 | 1082.99 | 936.16 | 824.75 | 652.86 | 558.98 |
|        | 1597.9 | 1120.14 | 936.16 | 826.49 | 676.62 | 581.35 |
|        | 1601.3 | 1120.19 | 947.13 | 826.5  | 678.58 | 581.35 |
|        | 1607.1 | 1120.19 | 981.9  | 830.03 | 712.73 | 590.98 |

|  |        |         |         |         |         |        |
|--|--------|---------|---------|---------|---------|--------|
|  | 1609.1 | 1121.9  | 984.11  | 830.04  | 714.66  | 624.57 |
|  | 1615.6 | 1169.34 | 984.12  | 831.75  | 725.47  | 624.57 |
|  | 1663.8 | 1170.51 | 985.64  | 852.98  | 726.31  | 634.77 |
|  | 1686.4 | 1170.51 | 985.65  | 852.98  | 742.97  | 637.57 |
|  | 1687.6 | 1172.1  | 989.91  | 863.48  | 742.97  | 637.57 |
|  | 3201.9 | 1278.26 | 990.22  | 867.01  | 755.8   | 645.24 |
|  | 3201.9 | 1282.82 | 990.23  | 868.71  | 755.91  | 645.25 |
|  | 3204.4 | 1282.82 | 990.26  | 868.72  | 796.77  | 654.27 |
|  | 3205.2 | 1289.08 | 990.26  | 877.96  | 816.17  | 654.27 |
|  | 3210.0 | 1329.42 | 1009.56 | 877.97  | 816.64  | 658.48 |
|  | 3210.0 | 1331.22 | 1009.56 | 883.02  | 831.46  | 685.12 |
|  | 3217.7 | 1331.22 | 1009.59 | 914.02  | 831.81  | 685.12 |
|  | 3217.8 | 1332.83 | 1009.6  | 924.97  | 833.12  | 719.72 |
|  | 3222.1 | 1380.12 | 1009.95 | 924.98  | 833.15  | 721.09 |
|  | 3223.2 | 1391.5  | 1056.48 | 941.94  | 834.74  | 731.75 |
|  | 3229.7 | 1391.5  | 1123.55 | 941.94  | 835.06  | 731.75 |
|  | 3229.7 | 1410.8  | 1123.55 | 949.8   | 836.2   | 746.91 |
|  |        | 1424.31 | 1124.69 | 983.32  | 846.37  | 746.91 |
|  |        | 1444.22 | 1124.69 | 984.89  | 846.64  | 760.74 |
|  |        | 1444.22 | 1129.12 | 984.89  | 863.73  | 760.74 |
|  |        | 1446.49 | 1133.79 | 986.41  | 863.85  | 766.34 |
|  |        | 1491.38 | 1133.8  | 986.42  | 867.62  | 792.55 |
|  |        | 1492.7  | 1160.13 | 986.94  | 867.84  | 812.28 |
|  |        | 1492.7  | 1160.13 | 992.53  | 874.49  | 812.28 |
|  |        | 1537.95 | 1191.62 | 992.54  | 874.59  | 838.91 |
|  |        | 1548.18 | 1191.63 | 992.56  | 882.45  | 838.91 |
|  |        | 1583.6  | 1202.65 | 992.57  | 882.45  | 844.33 |
|  |        | 1583.61 | 1202.65 | 992.57  | 886.36  | 844.9  |
|  |        | 1595.37 | 1208.78 | 992.58  | 922.78  | 844.9  |
|  |        | 1598.13 | 1245.71 | 1013.74 | 926.77  | 847.24 |
|  |        | 1598.13 | 1262.42 | 1013.74 | 928.3   | 847.24 |
|  |        | 1598.61 | 1262.42 | 1013.74 | 929.29  | 848.46 |
|  |        | 1600.24 | 1280.71 | 1013.75 | 930.81  | 848.46 |
|  |        | 1657.97 | 1280.71 | 1013.75 | 931.66  | 849.09 |
|  |        | 1664.89 | 1310.93 | 1013.78 | 939.8   | 859.55 |
|  |        | 1664.89 | 1312.99 | 1118.52 | 980.29  | 859.55 |
|  |        | 1672.82 | 1313    | 1122.82 | 980.6   | 867.6  |
|  |        | 3203.7  | 1314.79 | 1122.83 | 980.73  | 872.67 |
|  |        | 3203.7  | 1314.79 | 1122.92 | 981.02  | 875.45 |
|  |        | 3203.71 | 1354.06 | 1123.66 | 981.24  | 875.45 |
|  |        | 3203.73 | 1361.2  | 1123.67 | 981.4   | 882    |
|  |        | 3204.86 | 1361.2  | 1127.97 | 988.62  | 882    |
|  |        | 3204.87 | 1374.26 | 1131.19 | 996.11  | 888.21 |
|  |        | 3204.87 | 1374.26 | 1131.2  | 1003.56 | 888.21 |

|  |  |         |         |         |         |         |
|--|--|---------|---------|---------|---------|---------|
|  |  | 3204.94 | 1403.69 | 1153.2  | 1003.78 | 891.15  |
|  |  | 3234.72 | 1430.53 | 1153.21 | 1004.04 | 917.75  |
|  |  | 3234.94 | 1430.53 | 1163.54 | 1004.36 | 924.54  |
|  |  | 3234.94 | 1436.65 | 1184.37 | 1004.61 | 924.54  |
|  |  | 3235.26 | 1436.65 | 1190.54 | 1004.83 | 937.64  |
|  |  | 3235.64 | 1449.58 | 1190.54 | 1013.85 | 937.64  |
|  |  | 3235.8  | 1464.18 | 1200.83 | 1013.86 | 948.76  |
|  |  | 3235.8  | 1464.18 | 1200.83 | 1013.97 | 948.76  |
|  |  | 3235.89 | 1480.51 | 1209.68 | 1014.03 | 953.24  |
|  |  |         | 1480.51 | 1238.06 | 1014.11 | 992.66  |
|  |  |         | 1516.39 | 1251.75 | 1014.19 | 992.66  |
|  |  |         | 1516.4  | 1251.75 | 1014.22 | 992.69  |
|  |  |         | 1516.85 | 1268.45 | 1099.97 | 992.69  |
|  |  |         | 1522.82 | 1268.45 | 1119.13 | 992.7   |
|  |  |         | 1522.83 | 1275.88 | 1121.01 | 992.7   |
|  |  |         | 1582.83 | 1313.88 | 1124.27 | 992.71  |
|  |  |         | 1582.84 | 1314.78 | 1124.98 | 992.78  |
|  |  |         | 1590.3  | 1314.79 | 1126.49 | 996.12  |
|  |  |         | 1590.3  | 1316.54 | 1126.74 | 997.09  |
|  |  |         | 1594    | 1316.55 | 1127.56 | 997.09  |
|  |  |         | 1630.53 | 1317.42 | 1129.35 | 998.36  |
|  |  |         | 1632.58 | 1354.8  | 1129.97 | 998.36  |
|  |  |         | 1632.59 | 1359.99 | 1149.35 | 999.19  |
|  |  |         | 1632.83 | 1359.99 | 1149.38 | 999.19  |
|  |  |         | 1632.83 | 1370.07 | 1161.07 | 999.46  |
|  |  |         | 3202.46 | 1370.07 | 1161.32 | 1019.74 |
|  |  |         | 3202.49 | 1374.76 | 1192.75 | 1019.97 |
|  |  |         | 3202.49 | 1439.24 | 1193.37 | 1019.97 |
|  |  |         | 3202.55 | 1439.24 | 1198.42 | 1020.24 |
|  |  |         | 3202.55 | 1439.69 | 1198.64 | 1020.25 |
|  |  |         | 3204.5  | 1439.7  | 1206.64 | 1020.58 |
|  |  |         | 3204.5  | 1440.97 | 1207.23 | 1020.58 |
|  |  |         | 3204.52 | 1446.78 | 1212.35 | 1020.74 |
|  |  |         | 3204.53 | 1456.83 | 1246.39 | 1122.86 |
|  |  |         | 3204.59 | 1472.04 | 1255.18 | 1125.53 |
|  |  |         | 3229.61 | 1472.04 | 1255.99 | 1126.11 |
|  |  |         | 3229.61 | 1488.43 | 1267.05 | 1126.11 |
|  |  |         | 3229.75 | 1488.43 | 1268.36 | 1127.24 |
|  |  |         | 3229.75 | 1489.77 | 1274.79 | 1127.24 |
|  |  |         | 3229.88 | 1519.94 | 1276.96 | 1127.44 |
|  |  |         | 3230.19 | 1521.28 | 1313.96 | 1127.45 |
|  |  |         | 3230.2  | 1521.28 | 1314.08 | 1131.28 |
|  |  |         | 3230.21 | 1532.26 | 1315.48 | 1134.17 |
|  |  |         | 3230.23 | 1532.26 | 1315.73 | 1134.17 |

|  |  |  |         |         |         |         |
|--|--|--|---------|---------|---------|---------|
|  |  |  | 3230.23 | 1542.3  | 1318.2  | 1150.21 |
|  |  |  |         | 1592.2  | 1318.81 | 1150.21 |
|  |  |  |         | 1596.58 | 1320.22 | 1163.36 |
|  |  |  |         | 1596.58 | 1364.5  | 1163.36 |
|  |  |  |         | 1603.09 | 1369.49 | 1168.72 |
|  |  |  |         | 1603.09 | 1370.38 | 1190.1  |
|  |  |  |         | 1605.78 | 1372.21 | 1193.65 |
|  |  |  |         | 1635.65 | 1373.33 | 1193.65 |
|  |  |  |         | 1636.87 | 1373.55 | 1200.83 |
|  |  |  |         | 1636.87 | 1375.84 | 1200.83 |
|  |  |  |         | 1639    | 1413.99 | 1208.81 |
|  |  |  |         | 1639.01 | 1423.96 | 1208.81 |
|  |  |  |         | 1640.85 | 1429.09 | 1214.54 |
|  |  |  |         | 3202.66 | 1439.72 | 1243.53 |
|  |  |  |         | 3202.69 | 1445.68 | 1252.89 |
|  |  |  |         | 3202.69 | 1448.5  | 1252.89 |
|  |  |  |         | 3202.74 | 1451.11 | 1266.17 |
|  |  |  |         | 3202.74 | 1474.62 | 1266.17 |
|  |  |  |         | 3202.76 | 1482.36 | 1277.2  |
|  |  |  |         | 3204.74 | 1483.11 | 1277.2  |
|  |  |  |         | 3204.75 | 1486.62 | 1281.5  |
|  |  |  |         | 3204.75 | 1487.61 | 1321.76 |
|  |  |  |         | 3204.79 | 1492.17 | 1322.33 |
|  |  |  |         | 3204.79 | 1493.88 | 1322.33 |
|  |  |  |         | 3204.85 | 1517.59 | 1323.88 |
|  |  |  |         | 3229.98 | 1519.8  | 1323.88 |
|  |  |  |         | 3230.02 | 1521.78 | 1325.2  |
|  |  |  |         | 3230.03 | 1526.72 | 1325.2  |
|  |  |  |         | 3230.14 | 1528.36 | 1325.56 |
|  |  |  |         | 3230.15 | 1533    | 1357.59 |
|  |  |  |         | 3230.23 | 1535.73 | 1360.56 |
|  |  |  |         | 3230.56 | 1596.14 | 1360.56 |
|  |  |  |         | 3230.57 | 1598.82 | 1367.22 |
|  |  |  |         | 3230.57 | 1600.61 | 1367.22 |
|  |  |  |         | 3230.59 | 1601.5  | 1373.51 |
|  |  |  |         | 3230.59 | 1604.28 | 1373.51 |
|  |  |  |         | 3230.6  | 1604.6  | 1375.92 |
|  |  |  |         |         | 1605.94 | 1448.18 |
|  |  |  |         |         | 1638.7  | 1448.19 |
|  |  |  |         |         | 1638.91 | 1448.98 |
|  |  |  |         |         | 1640.24 | 1448.98 |
|  |  |  |         |         | 1640.47 | 1449.7  |
|  |  |  |         |         | 1641.61 | 1450.21 |
|  |  |  |         |         | 1641.68 | 1450.22 |

|  |  |  |  |  |         |         |
|--|--|--|--|--|---------|---------|
|  |  |  |  |  | 1642.06 | 1454.67 |
|  |  |  |  |  | 3202.24 | 1473.31 |
|  |  |  |  |  | 3203.22 | 1484.62 |
|  |  |  |  |  | 3203.23 | 1484.62 |
|  |  |  |  |  | 3203.25 | 1500.89 |
|  |  |  |  |  | 3203.26 | 1500.89 |
|  |  |  |  |  | 3203.26 | 1505.46 |
|  |  |  |  |  | 3203.27 | 1505.46 |
|  |  |  |  |  | 3204.29 | 1505.51 |
|  |  |  |  |  | 3217    | 1531.6  |
|  |  |  |  |  | 3217    | 1532.49 |
|  |  |  |  |  | 3217.02 | 1532.49 |
|  |  |  |  |  | 3217.05 | 1538.64 |
|  |  |  |  |  | 3217.08 | 1538.64 |
|  |  |  |  |  | 3217.14 | 1551.91 |
|  |  |  |  |  | 3218.74 | 1551.91 |
|  |  |  |  |  | 3218.75 | 1559.05 |
|  |  |  |  |  | 3218.81 | 1602.04 |
|  |  |  |  |  | 3218.87 | 1605.19 |
|  |  |  |  |  | 3219.16 | 1605.19 |
|  |  |  |  |  | 3219.16 | 1610.79 |
|  |  |  |  |  | 3230.2  | 1610.79 |
|  |  |  |  |  | 3230.67 | 1615.05 |
|  |  |  |  |  | 3231.38 | 1615.05 |
|  |  |  |  |  | 3231.39 | 1616.59 |
|  |  |  |  |  | 3231.46 | 1645.79 |
|  |  |  |  |  | 3231.54 | 1646.66 |
|  |  |  |  |  | 3231.83 | 1646.66 |
|  |  |  |  |  | 3231.83 | 1648.59 |
|  |  |  |  |  |         | 1648.59 |
|  |  |  |  |  |         | 1650.31 |
|  |  |  |  |  |         | 1650.31 |
|  |  |  |  |  |         | 1651.15 |
|  |  |  |  |  |         | 3212.1  |
|  |  |  |  |  |         | 3212.11 |
|  |  |  |  |  |         | 3212.11 |
|  |  |  |  |  |         | 3212.13 |
|  |  |  |  |  |         | 3212.13 |
|  |  |  |  |  |         | 3212.16 |
|  |  |  |  |  |         | 3212.16 |
|  |  |  |  |  |         | 3212.17 |
|  |  |  |  |  |         | 3214.13 |
|  |  |  |  |  |         | 3214.15 |
|  |  |  |  |  |         | 3214.15 |

|  |  |  |  |  |  |         |
|--|--|--|--|--|--|---------|
|  |  |  |  |  |  | 3214.18 |
|  |  |  |  |  |  | 3214.18 |
|  |  |  |  |  |  | 3214.24 |
|  |  |  |  |  |  | 3214.24 |
|  |  |  |  |  |  | 3214.3  |
|  |  |  |  |  |  | 3241.07 |
|  |  |  |  |  |  | 3241.09 |
|  |  |  |  |  |  | 3241.09 |
|  |  |  |  |  |  | 3241.15 |
|  |  |  |  |  |  | 3241.15 |
|  |  |  |  |  |  | 3241.22 |
|  |  |  |  |  |  | 3241.22 |
|  |  |  |  |  |  | 3241.26 |
|  |  |  |  |  |  | 3241.69 |
|  |  |  |  |  |  | 3241.7  |
|  |  |  |  |  |  | 3241.7  |
|  |  |  |  |  |  | 3241.7  |
|  |  |  |  |  |  | 3241.7  |
|  |  |  |  |  |  | 3241.7  |
|  |  |  |  |  |  | 3241.71 |
|  |  |  |  |  |  | 3241.73 |

**Table S5:** Optimized geometries of all cis-[n<sub>c</sub>]CPPDs (n = 2 to 8) and all trans-[n<sub>t</sub>]CPPDs (n = 2 to 8) comparing to strain free molecules.

| [n]CPPDs                                        | distance (Å) |         | Angle (deg) |                    | Point Group     |
|-------------------------------------------------|--------------|---------|-------------|--------------------|-----------------|
|                                                 | d (C-N)      | d (N=N) | ∠CNN        | ∠CNNC              |                 |
| [2 <sub>c</sub> ]CPPD                           | 1.464        | 1.262   | 117.2       | 0.0                | D <sub>2h</sub> |
| [2 <sub>t</sub> ]CPPD                           | 1.303        | 1.403   | 109.9       | 85.6               | C <sub>2h</sub> |
| [3 <sub>c</sub> ]CPPD                           | 1.446        | 1.251   | 120.2       | 8.3                | C <sub>s</sub>  |
| [3 <sub>t</sub> ]CPPD                           | 1.303        | 1.370   | 116.8       | 104.9              | C <sub>2</sub>  |
| [4 <sub>c</sub> ]CPPD                           | 1.430        | 1.249   | 125.1       | 12.3               | D <sub>2d</sub> |
| [4 <sub>t</sub> ]CPPD                           | 1.316        | 1.365   | 112.9       | 134.9              | D <sub>4</sub>  |
| [5 <sub>c</sub> ]CPPD                           | 1.427        | 1.251   | 129.3       | 10.9               | C <sub>1</sub>  |
| [5 <sub>t</sub> ]CPPD                           | 1.408        | 1.270   | 114.6       | 154.4              | D <sub>5</sub>  |
| [6 <sub>c</sub> ]CPPD <sub>1</sub>              | 1.433        | 1.252   | 123.3       | 10.3               | C <sub>2</sub>  |
| [6 <sub>c</sub> ]CPPD <sub>2</sub>              | 1.428        | 1.251   | 125.9       | -9.8               | C <sub>1</sub>  |
| [6 <sub>t</sub> ]CPPD                           | 1.412        | 1.265   | 114.8       | 158.8              | D <sub>6</sub>  |
| [7 <sub>c</sub> ]CPPD <sub>1</sub>              | 1.430        | 1.249   | 123.4       | 11.1               | C <sub>1</sub>  |
| [7 <sub>c</sub> ]CPPD <sub>2</sub>              | 1.430        | 1.249   | 126.4       | 5.9                | C <sub>1</sub>  |
| [7 <sub>t</sub> ]CPPD                           | 1.410        | 1.266   | 115.1       | 160.6              | D <sub>7</sub>  |
| <sup>c</sup> [8 <sub>c</sub> ]CPPD <sub>1</sub> | 1.433        | 1.248   | 124.2       | 11.1               | C <sub>1</sub>  |
| <sup>c</sup> [8 <sub>c</sub> ]CPPD <sub>2</sub> | 1.427        | 1.251   | 124.7       | 8.1                | C <sub>1</sub>  |
| <sup>c</sup> [8 <sub>t</sub> ]CPPD              | 1.413        | 1.264   | 114.9       | 164.1              | D <sub>8</sub>  |
| <sup>a,b</sup> trans-DB                         | 1.431        | 1.251   | 115.1       | <sup>e</sup> 180.0 | C <sub>2h</sub> |
| <sup>a,b</sup> cis-DB                           | 1.432        | 1.245   | 120.2       | <sup>e</sup> 2.4   | C <sub>2</sub>  |
| <sup>b</sup> trans AB                           | 1.420        | 1.258   | 115.3       | 179.9              | C <sub>2h</sub> |
| <sup>d</sup> trans AB                           | 1.430        | 1.250   | 114.1       | 180.0              | C <sub>2h</sub> |
| <sup>b</sup> trans AB                           | 1.440        | 1.249   | 124.0       | -9.5               | C <sub>2</sub>  |
| <sup>d</sup> cis AB                             | 1.450        | 1.250   | 121.9       | 0.0                | C <sub>2h</sub> |

<sup>a,b</sup>1,4-bis(diazenyl)benzene(bDB) <sup>b</sup>calculated at B3LYP/6-31+G(d,p); <sup>c</sup>calculated at B3LYP/6-31G(d), <sup>e</sup>∠CNNH; <sup>d</sup>experimentally determined value of cis –trans azobenzene (AB);

**Table S6:** Zero point energy (kJ mol<sup>-1</sup>), entropy (cal mol<sup>-1</sup> K<sup>-1</sup>) and thermal correction (kJ mol<sup>-1</sup>).

| [n]CPPDs                                        | ZPE    | S       | H <sub>T</sub> |
|-------------------------------------------------|--------|---------|----------------|
| [2 <sub>c</sub> ]CPPD                           | 462.7  | 97.73   | 493.7          |
| [2 <sub>t</sub> ]CPPD                           | 462.5  | 99.39   | 493.4          |
| [3 <sub>c</sub> ]CPPD                           | 702.6  | 134.49  | 784.1          |
| [3 <sub>t</sub> ]CPPD                           | 702.4  | 130.31  | 749.9          |
|                                                 |        |         |                |
| [4 <sub>c</sub> ]CPPD                           | 937.7  | 166.16  | 1003.0         |
| [4 <sub>t</sub> ]CPPD                           | 937.4  | 162.00  | 1053.7         |
| [5 <sub>c</sub> ]CPPD                           | 1172.9 | 198.89  | 1255.5         |
| [5 <sub>t</sub> ]CPPD                           | 1173.0 | 194.53  | 1255.0         |
| [6 <sub>c</sub> ]CPPD <sub>1</sub>              | 1407.8 | 232.35  | 1507.7         |
| [6 <sub>c</sub> ]CPPD <sub>2</sub>              | 1409.5 | 232.211 | 1509.1         |
| [6 <sub>t</sub> ]CPPD                           | 1409.8 | 229.28  | 1509.6         |
| [7 <sub>c</sub> ]CPPD <sub>1</sub>              | 1648.3 | 264.28  | 1765.1         |
| [7 <sub>c</sub> ]CPPD <sub>2</sub>              | 1648.5 | 266.82  | 1765.5         |
| [7 <sub>t</sub> ]CPPD                           | 1646.6 | 262.27  | 1763.6         |
| <sup>c</sup> [8 <sub>c</sub> ]CPPD <sub>1</sub> | 1884.4 | 295.87  | 2018.3         |
| <sup>c</sup> [8 <sub>c</sub> ]CPPD <sub>2</sub> | 1887.1 | 286.57  | 2020.0         |
| <sup>c</sup> [8 <sub>t</sub> ]CPPD              | 1888.7 | 295.48  | 2023.6         |

<sup>c</sup>Calculated using B3LYP/6-31G(d) level



**Table 7:** Ring diameter ( $r_d$ ) (nm) and HOMO-LUMO (H-L) gap (eV) for cis and trans isomer of CPPDs, CPPAs, and CPPs.

| [n]CPPDs/<br>[n]CPPAs/<br>[n]CPPs | <sup>a</sup> CPPD <sub>s</sub><br>H-L | <sup>b</sup> CPPD <sub>s</sub><br>H-L  | <sup>c</sup> CPPA <sub>s</sub><br>H-L | <sup>d</sup> CPP <sub>s</sub><br>H-L | <sup>a</sup> CPPD <sub>s</sub><br>$r_d$ | <sup>c</sup> CPPA <sub>s</sub><br>$r_d$ | <sup>d</sup> CPP <sub>s</sub><br>$r_d$ |
|-----------------------------------|---------------------------------------|----------------------------------------|---------------------------------------|--------------------------------------|-----------------------------------------|-----------------------------------------|----------------------------------------|
| [4]                               | 2.00                                  | 2.49                                   | 2.99                                  | 2.51                                 | 0.75                                    | 0.83                                    | -                                      |
| [5]                               | 2.36                                  | 2.57                                   | 3.51                                  | 2.71                                 | 0.97                                    | 1.09                                    | 0.67                                   |
| [6]                               | 1.98                                  | <sup>e</sup> 2.85<br><sup>f</sup> 2.63 | 3.02                                  | 3.14                                 | 1.18                                    | 1.30                                    | 0.79                                   |
| [7]                               | 2.22                                  | <sup>e</sup> 2.67<br><sup>f</sup> 2.58 | 3.32                                  | 3.17                                 | 1.39                                    | 1.53                                    | 0.95                                   |
| [8]                               | 2.12                                  | <sup>e</sup> 2.39<br><sup>f</sup> 2.74 | 3.05                                  | 3.41                                 | 1.58                                    | 1.73                                    | 1.1                                    |

<sup>a</sup>trans isomer; <sup>b</sup>cis isomer; <sup>c</sup>values taken from Ali and Krishnan<sup>20</sup>; <sup>d</sup>values taken from Iwamoto et al.; <sup>e</sup>conformation 1 and <sup>f</sup>conformation 2

Starting unoptimized structure

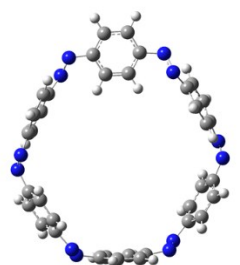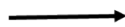

Final optimized structure

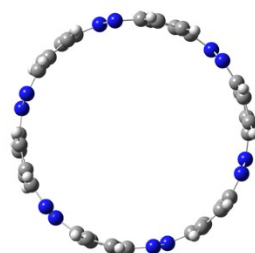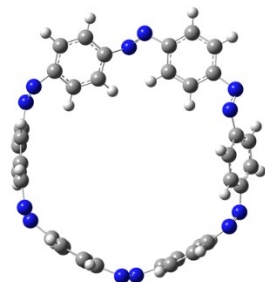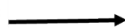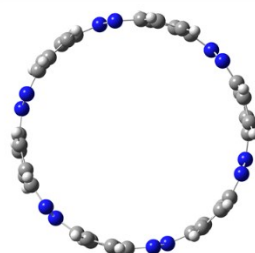

Starting unoptimized structure

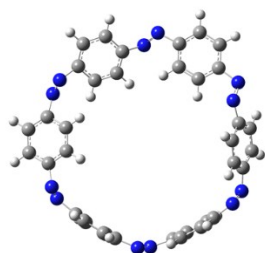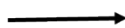

Final optimized structure

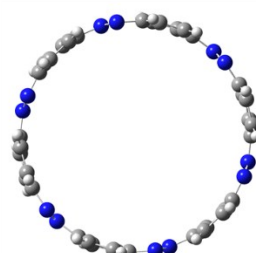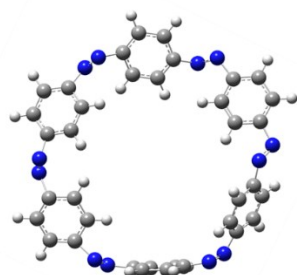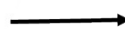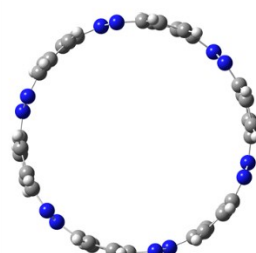

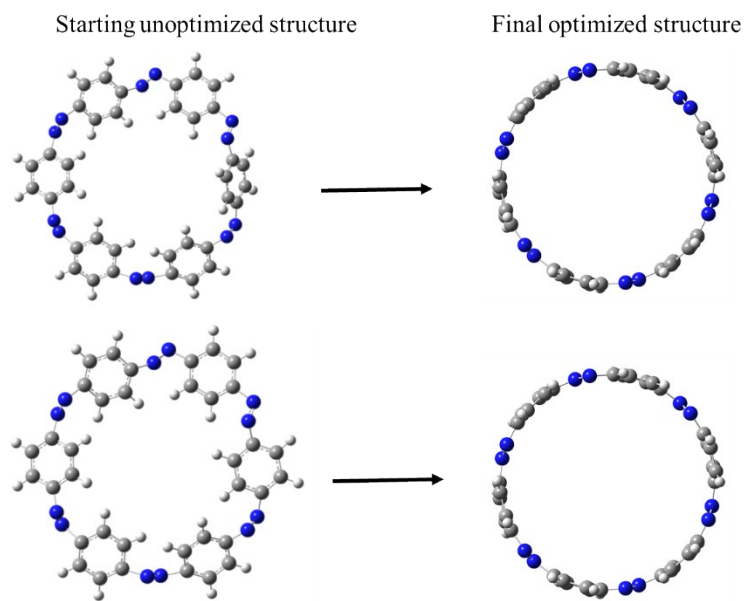

**Figure S1:** Different initial guess of [6<sub>t</sub>]CPPD.

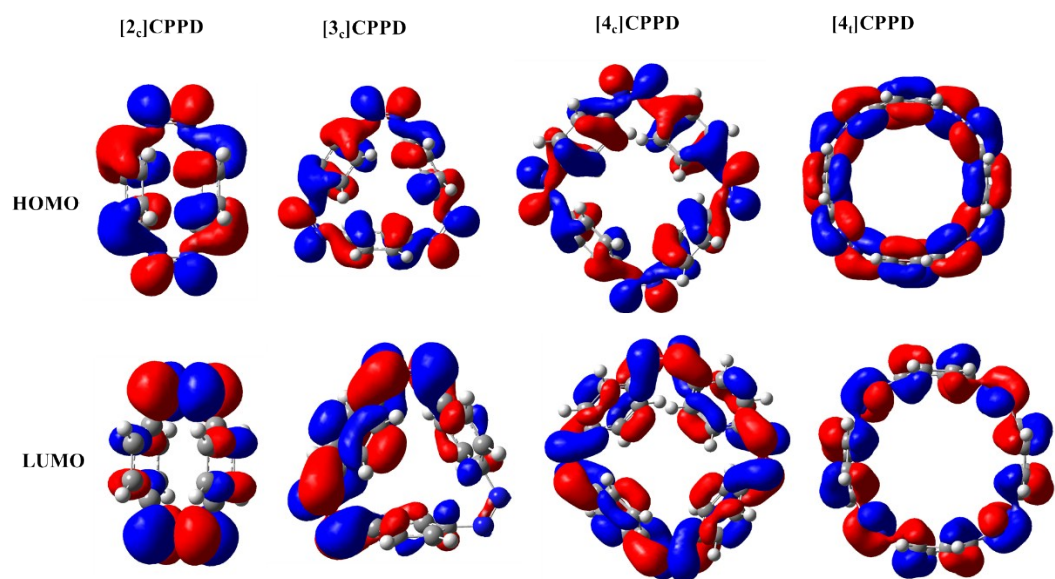

**Figure S2a:** HOMO and LUMO spatial diagram for [n]CPPDs (n = 2 to 4) obtained using B3LYP/6-31+G(d,p) level of theory .

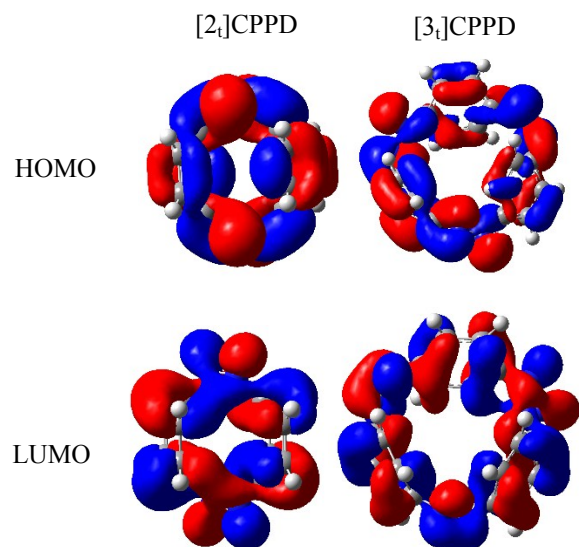

**Figure S2b:** HOMO and LUMO spatial diagram for trans [n]CPPDs (n = 2 to 3) obtained using B3LYP/6-31+G(d,p) level of theory.

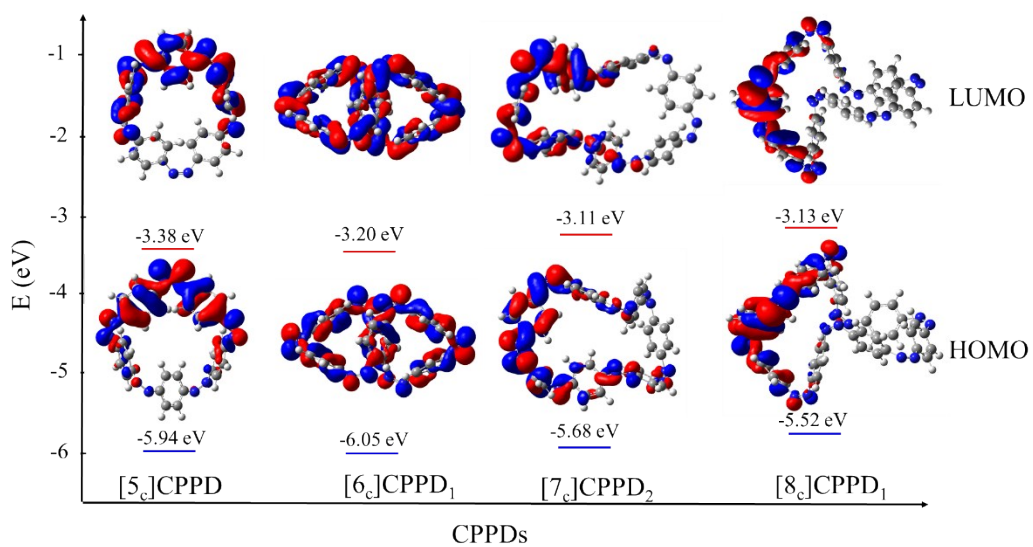

**Figure S2c.** Spatial distribution (0.02 au) and energy level diagram of HOMO and LUMO orbitals for cis isomer of [n]CPPD (n = 5 to 8).

## Full Reference of Gaussian 09

Frisch, M. J.; Trucks, G. W.; Schlegel, H. B.; Scuseria, G. E.; Robb, M. A.; Cheeseman, J. R.; Scalmani, G.; Barone, V.; Mennucci, B.; Petersson, G. A.; Nakatsuji, H.; Caricato, M.; Li, X.; Hratchian, H. P.; Izmaylov, A. F.; Bloino, J.; Zheng, G.; Sonnenberg, J. L.; Hada, M.; Ehara, M.; Toyota, K.; Fukuda, R.; Hasegawa, J.; Ishida, M.; Nakajima, T.; Honda, Y.; Kitao, O.; Nakai, H.; Vreven, T.; Montgomery, J. A., Jr.; Peralta, J. E.; Ogliaro, F.; Bearpark, M.; Heyd, J. J.; Brothers, E.; Kudin, K. N.; Staroverov, V. N.; Kobayashi, R.; Normand, J.; Raghavachari, K.; Rendell, A.; Burant, J. C.; Iyengar, S. S.; Tomasi, J.; Cossi, M.; Rega, N.; Millam, J. M.; Klene, M.; Knox, J. E.; Cross, J. B.; Bakken, V.; Adamo, C.; Jaramillo, J.; Gomperts, R.; Stratmann, R. E.; Yazyev, O.; Austin, A. J.; Cammi, R.; Pomelli, C. J.; Ochterski, W.; Martin, R. L.; Morokuma, K.; Zakrzewski, V. G.; Voth, G. A.; Salvador, P.; Dannenberg, J. J.; Dapprich, S.; Daniels, A. D.; Farkas, O.; Foresman, J. B.; Ortiz, J. V.; Cioslowski, J. Gaussian 09, revision D.01; Gaussian, Inc.: Wallingford, CT, 2009.

Frisch, M. J.; Trucks, G. W.; Schlegel, H. B.; Scuseria, G. E.; Robb, M. A.; Cheeseman, J. R.; Scalmani, G.; Barone, V.; Mennucci, B.; Petersson, G. A.; Nakatsuji, H.; Caricato, M.; Li, X.; Hratchian, H. P.; Izmaylov, A. F.; Bloino, J.; Zheng, G.; Sonnenberg, J. L.; Hada, M.; Ehara, M.; Toyota, K.; Fukuda, R.; Hasegawa, J.; Ishida, M.; Nakajima, T.; Honda, Y.; Kitao, O.; Nakai, H.; Vreven, T.; Montgomery, J. A., Jr.; Peralta, J. E.; Ogliaro, F.; Bearpark, M.; Heyd, J. J.; Brothers, E.; Kudin, K. N.; Staroverov, V. N.; Kobayashi, R.; Normand, J.; Raghavachari, K.; Rendell, A.; Burant, J. C.; Iyengar, S. S.; Tomasi, J.; Cossi, M.; Rega, N.; Millam, J. M.; Klene, M.; Knox, J. E.; Cross, J. B.; Bakken, V.; Adamo, C.; Jaramillo, J.; Gomperts, R.; Stratmann, R. E.; Yazyev, O.; Austin, A. J.; Cammi, R.; Pomelli, C.; Ochterski, J. W.; Martin, R. L.; Morokuma, K.; Zakrzewski, V. G.; Voth, G. A.; Salvador, P.; Dannenberg, J. J.; Dapprich, S.; Daniels, A. D.; Farkas, Ö.; Foresman, J. B.; Ortiz, J. V.; Cioslowski, J.; Fox, D. J. Gaussian 09, Revision E.01, Gaussian, Inc., Wallingford CT, 2009.
